# Supplementary material for: Expression Regulation of Water Reabsorption Genes and Transcription Factors in the Kidneys of Lepus yarkandensis
Source: Front Physiol. 2022 May 26;13:856427. doi: 10.3389/fphys.2022.856427 (PMC9204326; doi:10.3389/fphys.2022.856427)
Supplement: Supplementary file 11 [file Table7.XLSX]

## Sheet: Sheet1
Table S7. Enrichment analysis of DEGs between L. yarkandensis and O. cuniculus based on KEGG pathway
Category	ID	Description	GeneRatio	BgRatio	pvalue	padj	Count	geneID
KEGG	ko00982	Drug metabolism - cytochrome P450	53|1559	79|5842	1.8633e-07	6.14888e-05	53	Cluster-1445.21718|Cluster-1445.9541|Cluster-1445.10493|Cluster-1445.17127|Cluster-1445.22040|Cluster-1445.21841|Cluster-1445.22770|Cluster-1445.7280|Cluster-1445.20733|Cluster-1445.16808|Cluster-1445.18978|Cluster-1445.14073|Cluster-1445.17332|Cluster-1445.7084|Cluster-1445.17562|Cluster-1445.3860|Cluster-1445.4275|Cluster-1445.18014|Cluster-1445.10950|Cluster-1445.17712|Cluster-1445.21400|Clust…
KEGG	ko00040	Pentose and glucuronate interconversions	39|1559	49|5842	3.82769e-07	6.23801e-05	39	Cluster-1445.9541|Cluster-1445.17127|Cluster-1445.22040|Cluster-1445.22770|Cluster-1445.7280|Cluster-1445.17023|Cluster-1445.20733|Cluster-1445.16808|Cluster-1445.17899|Cluster-1445.18978|Cluster-1445.14073|Cluster-1445.17213|Cluster-1445.3860|Cluster-1445.18409|Cluster-1445.21400|Cluster-1445.21401|Cluster-1445.7938|Cluster-1445.27682|Cluster-1445.12453|Cluster-1445.16554|Cluster-1445.17769|Clus…
KEGG	ko05204	Chemical carcinogenesis	59|1559	99|5842	7.38851e-07	6.23801e-05	59	Cluster-1445.21718|Cluster-1445.17040|Cluster-1445.16564|Cluster-1445.9541|Cluster-1445.17127|Cluster-1445.17712|Cluster-1445.25194|Cluster-1445.22770|Cluster-1445.7280|Cluster-1445.20733|Cluster-1445.16808|Cluster-1445.14932|Cluster-1445.18978|Cluster-1445.14073|Cluster-1445.7084|Cluster-1445.16385|Cluster-1445.17562|Cluster-1445.10015|Cluster-1445.3860|Cluster-1445.18502|Cluster-1445.22040|Clus…
KEGG	ko00980	Metabolism of xenobiotics by cytochrome P450	55|1559	89|5842	7.56123e-07	6.23801e-05	55	Cluster-1445.21718|Cluster-1445.17040|Cluster-1445.9541|Cluster-1445.17127|Cluster-1445.22040|Cluster-1445.16704|Cluster-1445.22770|Cluster-1445.7280|Cluster-1445.20733|Cluster-1445.16808|Cluster-1445.18978|Cluster-1445.14073|Cluster-1445.17213|Cluster-1445.7084|Cluster-1445.17562|Cluster-1445.18383|Cluster-1445.10015|Cluster-1445.3860|Cluster-1445.4275|Cluster-1445.18014|Cluster-1445.10950|Clust…
KEGG	ko00053	Ascorbate and aldarate metabolism	34|1559	41|5842	1.11008e-06	6.52502e-05	34	Cluster-1445.9541|Cluster-1445.17127|Cluster-1445.22040|Cluster-1445.22770|Cluster-1445.7280|Cluster-1445.20733|Cluster-1445.16808|Cluster-1445.17899|Cluster-1445.18978|Cluster-1445.14073|Cluster-1445.3860|Cluster-1445.21400|Cluster-1445.21401|Cluster-1445.27682|Cluster-1445.18058|Cluster-1445.12453|Cluster-1445.16554|Cluster-1445.17769|Cluster-1445.13627|Cluster-1445.23614|Cluster-1445.14932|Clu…
KEGG	ko00140	Steroid hormone biosynthesis	47|1559	71|5842	1.18637e-06	6.52502e-05	47	Cluster-1445.9541|Cluster-1445.17127|Cluster-1445.22040|Cluster-1445.22770|Cluster-1445.7280|Cluster-1445.1284|Cluster-1445.16808|Cluster-1445.16968|Cluster-1445.14073|Cluster-1445.10002|Cluster-1445.16385|Cluster-1445.3860|Cluster-1445.18978|Cluster-1445.20561|Cluster-1445.21400|Cluster-1445.21401|Cluster-1445.17626|Cluster-1445.19216|Cluster-1445.13627|Cluster-1445.27682|Cluster-1445.4139|Clust…
KEGG	ko00983	Drug metabolism - other enzymes	43|1559	68|5842	7.73489e-06	0.000364645	43	Cluster-1445.9541|Cluster-1445.17127|Cluster-1445.22040|Cluster-1445.10982|Cluster-1445.12299|Cluster-1445.22770|Cluster-1445.7280|Cluster-1445.20733|Cluster-1445.16808|Cluster-1445.18978|Cluster-1445.14073|Cluster-1445.3860|Cluster-1445.10134|Cluster-1445.19212|Cluster-1445.21400|Cluster-1445.21401|Cluster-1445.20708|Cluster-1445.6690|Cluster-1445.10978|Cluster-1445.13627|Cluster-1445.18983|Clus…
KEGG	ko00830	Retinol metabolism	48|1559	82|5842	1.09954e-05	0.000453559	48	Cluster-1445.16564|Cluster-1445.18502|Cluster-1445.17127|Cluster-1445.16065|Cluster-1445.1441|Cluster-1445.9541|Cluster-1445.21841|Cluster-1445.22770|Cluster-1445.7280|Cluster-1445.20733|Cluster-1445.16808|Cluster-1445.18978|Cluster-1445.14073|Cluster-1445.17332|Cluster-1445.16385|Cluster-1445.3860|Cluster-1445.14260|Cluster-1445.17842|Cluster-1445.22040|Cluster-1445.21400|Cluster-1445.21401|Clus…
KEGG	ko00500	Starch and sucrose metabolism	46|1559	78|5842	1.44415e-05	0.000529522	46	Cluster-1445.9541|Cluster-1445.17127|Cluster-1445.22040|Cluster-1445.11728|Cluster-1445.22770|Cluster-1445.7280|Cluster-1445.20733|Cluster-1445.16808|Cluster-1445.18978|Cluster-1445.27268|Cluster-1445.14073|Cluster-1445.3865|Cluster-1445.3860|Cluster-1445.26002|Cluster-1445.21400|Cluster-1445.21401|Cluster-1445.7938|Cluster-10932.0|Cluster-1445.19106|Cluster-1445.18983|Cluster-1445.18004|Cluster-…
KEGG	ko00860	Porphyrin and chlorophyll metabolism	37|1559	59|5842	3.70496e-05	0.00122264	37	Cluster-1445.9541|Cluster-1445.17127|Cluster-1445.22040|Cluster-1445.17066|Cluster-1445.22770|Cluster-1445.7280|Cluster-1445.20733|Cluster-1445.16808|Cluster-1445.18978|Cluster-1445.14073|Cluster-1445.3860|Cluster-1445.21400|Cluster-1445.21401|Cluster-1445.27682|Cluster-1445.12453|Cluster-1445.16554|Cluster-1445.17769|Cluster-1445.13627|Cluster-1445.23614|Cluster-1445.14932|Cluster-1445.6036|Clus…
KEGG	ko05146	Amoebiasis	58|1559	126|5842	0.000272604	0.00817811	58	Cluster-1445.1992|Cluster-1445.2707|Cluster-1445.4069|Cluster-1445.10522|Cluster-1445.23508|Cluster-1445.22898|Cluster-1445.25462|Cluster-1445.12365|Cluster-1445.19066|Cluster-1445.12257|Cluster-1445.24628|Cluster-1445.14967|Cluster-1445.23331|Cluster-1445.22025|Cluster-1445.29041|Cluster-1445.4612|Cluster-1445.20995|Cluster-1445.27378|Cluster-5010.1|Cluster-1445.29033|Cluster-1445.6245|Cluster-1…
KEGG	ko04974	Protein digestion and absorption	44|1559	92|5842	0.000776439	0.0213521	44	Cluster-1445.8148|Cluster-1445.4069|Cluster-1445.22517|Cluster-1445.10522|Cluster-1445.23508|Cluster-1445.126|Cluster-1445.28945|Cluster-1445.15429|Cluster-1445.9787|Cluster-1445.12502|Cluster-1445.3738|Cluster-1445.17896|Cluster-1445.23331|Cluster-1445.22025|Cluster-1445.8416|Cluster-1445.20995|Cluster-1445.6369|Cluster-1445.6368|Cluster-1445.12849|Cluster-1445.25510|Cluster-1445.5417|Cluster-97…
KEGG	ko04512	ECM-receptor interaction	57|1559	132|5842	0.00103222	0.0262025	57	Cluster-1445.1992|Cluster-1445.4069|Cluster-1445.11818|Cluster-1445.23508|Cluster-1445.10527|Cluster-1445.13321|Cluster-1445.22898|Cluster-11142.0|Cluster-1445.25462|Cluster-1445.29499|Cluster-1445.9787|Cluster-3186.0|Cluster-1445.24628|Cluster-1445.12380|Cluster-1445.29041|Cluster-1445.4612|Cluster-1445.20995|Cluster-1445.5419|Cluster-1445.6245|Cluster-1445.18112|Cluster-1445.6094|Cluster-1445.2…
KEGG	ko05150	Staphylococcus aureus infection	28|1559	60|5842	0.00833683	0.196511	28	Cluster-1445.18829|Cluster-1445.2810|Cluster-1445.11552|Cluster-1445.14090|Cluster-1445.13405|Cluster-1445.18744|Cluster-1445.29033|Cluster-1445.11850|Cluster-1445.27573|Cluster-1445.8892|Cluster-1445.24848|Cluster-1445.19437|Cluster-1445.19360|Cluster-1445.547|Cluster-1445.8243|Cluster-1445.5830|Cluster-1445.21602|Cluster-1445.19317|Cluster-1445.11506|Cluster-1445.27915|Cluster-1445.7435|Cluster…
KEGG	ko04510	Focal adhesion	87|1559	253|5842	0.0129719	0.285382	87	Cluster-1445.16060|Cluster-1445.18824|Cluster-1445.6094|Cluster-1445.24628|Cluster-1445.23331|Cluster-1445.29041|Cluster-1445.24986|Cluster-1445.11371|Cluster-1445.360|Cluster-8410.0|Cluster-1445.27693|Cluster-1445.14815|Cluster-1445.17289|Cluster-1445.3185|Cluster-1445.2225|Cluster-1445.9537|Cluster-1445.15799|Cluster-1445.21771|Cluster-1445.27205|Cluster-1445.22435|Cluster-1445.14902|Cluster-14…
KEGG	ko00531	Glycosaminoglycan degradation	12|1559	19|5842	0.0154393	0.313056	12	Cluster-1445.19264|Cluster-1445.18025|Cluster-1445.4039|Cluster-1445.8603|Cluster-1445.20672|Cluster-1445.29398|Cluster-1445.6036|Cluster-1445.15835|Cluster-1445.16796|Cluster-1445.19761|Cluster-1445.20638|Cluster-1445.11074
KEGG	ko05222	Small cell lung cancer	45|1559	117|5842	0.0161271	0.313056	45	Cluster-1445.1992|Cluster-1445.4069|Cluster-1445.11818|Cluster-1445.10186|Cluster-1445.13711|Cluster-1445.22898|Cluster-1445.27205|Cluster-1445.25462|Cluster-1445.10174|Cluster-1445.19066|Cluster-1445.24628|Cluster-1445.29041|Cluster-1445.14101|Cluster-1445.4612|Cluster-1445.20995|Cluster-1445.6245|Cluster-1445.24986|Cluster-1445.14266|Cluster-1445.27378|Cluster-1445.12946|Cluster-1445.6793|Clust…
KEGG	ko04610	Complement and coagulation cascades	32|1559	77|5842	0.0176952	0.324412	32	Cluster-1445.2810|Cluster-1445.2707|Cluster-1445.4067|Cluster-3186.0|Cluster-1445.8352|Cluster-1445.4043|Cluster-1445.18922|Cluster-1445.5550|Cluster-1445.13405|Cluster-1445.18744|Cluster-1445.6206|Cluster-1445.11850|Cluster-1445.8888|Cluster-1445.24848|Cluster-1445.1701|Cluster-1445.22614|Cluster-1445.19437|Cluster-1445.19360|Cluster-1445.11338|Cluster-1445.3520|Cluster-1445.21602|Cluster-1445.8…
KEGG	ko04060	Cytokine-cytokine receptor interaction	54|1559	148|5842	0.0195105	0.338867	54	Cluster-1445.11495|Cluster-1445.27854|Cluster-1445.16212|Cluster-1445.771|Cluster-1445.538|Cluster-10481.0|Cluster-1445.20397|Cluster-1445.2647|Cluster-1445.18659|Cluster-1445.13732|Cluster-1445.18619|Cluster-1445.12074|Cluster-1445.7338|Cluster-1445.20252|Cluster-6240.0|Cluster-1445.25513|Cluster-1445.28702|Cluster-1445.27456|Cluster-1445.26557|Cluster-1445.11476|Cluster-1445.25276|Cluster-1445.…
KEGG	ko05145	Toxoplasmosis	44|1559	118|5842	0.0251017	0.414178	44	Cluster-1445.18829|Cluster-1445.11552|Cluster-1445.13711|Cluster-1445.17160|Cluster-1445.25462|Cluster-1445.12365|Cluster-1445.1992|Cluster-1445.14090|Cluster-1445.29041|Cluster-1445.17890|Cluster-1445.24989|Cluster-1445.6245|Cluster-1445.24986|Cluster-1445.14266|Cluster-1445.27378|Cluster-1445.19317|Cluster-1445.3396|Cluster-1445.20256|Cluster-1445.9312|Cluster-1445.360|Cluster-1445.19066|Cluste…
KEGG	ko00120	Primary bile acid biosynthesis	10|1559	17|5842	0.0356667	0.560477	10	Cluster-1445.552|Cluster-1445.6385|Cluster-9089.0|Cluster-1445.28129|Cluster-1445.1977|Cluster-1445.5309|Cluster-1445.16485|Cluster-1445.1284|Cluster-1445.12149|Cluster-1445.7822
KEGG	ko04640	Hematopoietic cell lineage	27|1559	68|5842	0.0408498	0.601688	27	Cluster-1445.18096|Cluster-8645.0|Cluster-1445.6399|Cluster-1445.13711|Cluster-1445.13321|Cluster-1445.538|Cluster-1445.14947|Cluster-1445.20397|Cluster-1445.8352|Cluster-1445.29033|Cluster-1445.25513|Cluster-1445.18112|Cluster-1445.6793|Cluster-1445.17578|Cluster-1445.242|Cluster-1445.12884|Cluster-1445.10527|Cluster-1445.5698|Cluster-1445.27063|Cluster-1445.6634|Cluster-1445.21771|Cluster-1445.…
KEGG	ko00480	Glutathione metabolism	22|1559	53|5842	0.0441246	0.601688	22	Cluster-1445.21718|Cluster-1445.16230|Cluster-1445.18096|Cluster-1445.17712|Cluster-1445.7084|Cluster-1445.17562|Cluster-1445.12730|Cluster-1445.5006|Cluster-1445.4275|Cluster-1445.18014|Cluster-1445.10950|Cluster-1445.15185|Cluster-1445.2713|Cluster-1445.21539|Cluster-1445.5699|Cluster-1445.17404|Cluster-1445.17173|Cluster-1445.6751|Cluster-1445.17152|Cluster-1445.17150|Cluster-1445.17544|Cluste…
KEGG	ko04977	Vitamin digestion and absorption	17|1559	38|5842	0.0453461	0.601688	17	Cluster-1445.11892|Cluster-1445.1996|Cluster-5635.0|Cluster-1445.13426|Cluster-1445.27714|Cluster-1445.4106|Cluster-1445.13027|Cluster-1445.3690|Cluster-1445.12918|Cluster-1445.6765|Cluster-1445.11744|Cluster-1445.17916|Cluster-1445.18323|Cluster-1445.9256|Cluster-1445.24570|Cluster-1445.19744|Cluster-1445.2267
KEGG	ko00100	Steroid biosynthesis	10|1559	18|5842	0.0455824	0.601688	10	Cluster-1445.11163|Cluster-1445.5231|Cluster-1445.10002|Cluster-1445.17099|Cluster-1445.15164|Cluster-1445.22110|Cluster-1445.6032|Cluster-1445.28437|Cluster-1445.8529|Cluster-1445.21005
KEGG	ko03320	PPAR signaling pathway	30|1559	79|5842	0.048287	0.612873	30	Cluster-9089.0|Cluster-1445.20666|Cluster-1445.16485|Cluster-1445.14947|Cluster-1445.21807|Cluster-1445.25676|Cluster-1445.6207|Cluster-1445.13424|Cluster-1445.17570|Cluster-1445.22441|Cluster-1445.22440|Cluster-1445.6385|Cluster-1445.27835|Cluster-1445.8326|Cluster-1445.13355|Cluster-1445.16755|Cluster-1445.21497|Cluster-1445.12631|Cluster-1445.10034|Cluster-1445.13371|Cluster-1445.22907|Cluster…
KEGG	ko00561	Glycerolipid metabolism	19|1559	45|5842	0.0524049	0.640505	19	Cluster-1445.13229|Cluster-1445.19322|Cluster-1445.14360|Cluster-1445.11306|Cluster-1445.18409|Cluster-1445.3026|Cluster-1445.28071|Cluster-1445.4549|Cluster-5635.0|Cluster-1445.18708|Cluster-1445.17023|Cluster-1445.16797|Cluster-1445.17899|Cluster-1445.14970|Cluster-1445.23757|Cluster-1445.29147|Cluster-1445.10829|Cluster-1445.24768|Cluster-1445.6166
KEGG	ko04514	Cell adhesion molecules (CAMs)	46|1559	134|5842	0.0585892	0.690515	46	Cluster-1445.3670|Cluster-1445.18829|Cluster-8101.1|Cluster-8101.0|Cluster-1445.23119|Cluster-1445.9799|Cluster-1445.11552|Cluster-1445.13711|Cluster-1445.7991|Cluster-1445.6094|Cluster-1445.18732|Cluster-1445.17514|Cluster-1445.16334|Cluster-1445.14090|Cluster-1445.12380|Cluster-1445.24818|Cluster-1445.9867|Cluster-1445.27573|Cluster-1445.17659|Cluster-4709.0|Cluster-1445.4415|Cluster-1445.1747|…
KEGG	ko05322	Systemic lupus erythematosus	25|1559	65|5842	0.0608374	0.692287	25	Cluster-1445.18829|Cluster-1445.2707|Cluster-1445.4067|Cluster-1445.11552|Cluster-1445.4043|Cluster-1445.7006|Cluster-1445.18744|Cluster-1445.29033|Cluster-1445.11371|Cluster-1445.19317|Cluster-1445.1255|Cluster-1445.8892|Cluster-1445.20587|Cluster-1445.21602|Cluster-1445.14090|Cluster-8977.0|Cluster-1445.19437|Cluster-1445.2519|Cluster-1445.15405|Cluster-1445.4509|Cluster-1445.10823|Cluster-1445…
KEGG	ko04151	PI3K-Akt signaling pathway	111|1559	363|5842	0.0645439	0.709983	111	Cluster-1445.16060|Cluster-1445.6094|Cluster-1445.12365|Cluster-1445.10303|Cluster-1445.24628|Cluster-1445.23331|Cluster-1445.12074|Cluster-1445.29041|Cluster-1445.18172|Cluster-1445.25513|Cluster-1445.14902|Cluster-1445.360|Cluster-1445.24424|Cluster-1445.14815|Cluster-1445.26875|Cluster-1445.3185|Cluster-1445.7018|Cluster-1445.9537|Cluster-1445.538|Cluster-1445.15799|Cluster-1445.14101|Cluster-…
KEGG	ko04975	Fat digestion and absorption	15|1559	35|5842	0.0728594	0.7756	15	Cluster-1445.13229|Cluster-1445.19322|Cluster-1445.11892|Cluster-1445.1996|Cluster-5635.0|Cluster-1445.13426|Cluster-1445.13027|Cluster-1445.6765|Cluster-1445.14947|Cluster-1445.23811|Cluster-1445.18162|Cluster-1445.24570|Cluster-1445.2267|Cluster-1445.29891|Cluster-1445.6166
KEGG	ko00750	Vitamin B6 metabolism	5|1559	7|5842	0.0795895	0.809257	5	Cluster-1445.19376|Cluster-1445.12998|Cluster-6804.0|Cluster-1445.21841|Cluster-1445.17332
KEGG	ko04614	Renin-angiotensin system	8|1559	15|5842	0.0809257	0.809257	8	Cluster-1445.11047|Cluster-1445.18096|Cluster-1445.12320|Cluster-1445.13681|Cluster-1445.17608|Cluster-1445.17722|Cluster-1445.17834|Cluster-1445.18128
KEGG	ko04940	Type I diabetes mellitus	14|1559	33|5842	0.0855016	0.819796	14	Cluster-1445.2421|Cluster-1445.18829|Cluster-1445.15405|Cluster-1445.14574|Cluster-1445.11552|Cluster-1445.13957|Cluster-1445.7991|Cluster-1445.19317|Cluster-1445.23705|Cluster-1445.14090|Cluster-1445.16089|Cluster-1445.8892|Cluster-1445.8382|Cluster-1445.14064
KEGG	ko05416	Viral myocarditis	24|1559	65|5842	0.0869481	0.819796	24	Cluster-1445.18829|Cluster-1445.11552|Cluster-1445.7991|Cluster-1445.14101|Cluster-1445.10223|Cluster-1445.14090|Cluster-1445.20502|Cluster-1445.29033|Cluster-1445.16089|Cluster-1445.8892|Cluster-1445.2421|Cluster-1445.19317|Cluster-1445.17156|Cluster-1445.10477|Cluster-1445.14950|Cluster-1445.14064|Cluster-1445.7435|Cluster-1445.15405|Cluster-1445.4509|Cluster-1445.24578|Cluster-1445.23705|Clust…
KEGG	ko04145	Phagosome	51|1559	157|5842	0.0901114	0.826021	51	Cluster-1445.3438|Cluster-1445.12365|Cluster-1445.18829|Cluster-1445.6895|Cluster-1445.17128|Cluster-1445.11552|Cluster-1445.12275|Cluster-1445.7991|Cluster-1445.3518|Cluster-1445.11515|Cluster-1445.14947|Cluster-1445.14090|Cluster-1445.16023|Cluster-1445.4206|Cluster-1445.18744|Cluster-1445.29033|Cluster-9671.0|Cluster-1445.6793|Cluster-1445.16089|Cluster-1445.19559|Cluster-1445.8892|Cluster-144…
KEGG	ko00260	Glycine, serine and threonine metabolism	16|1559	40|5842	0.0951643	0.831739	16	Cluster-1445.15731|Cluster-1445.12258|Cluster-1445.19357|Cluster-1445.4229|Cluster-1445.9505|Cluster-1445.13435|Cluster-1445.19703|Cluster-1445.15973|Cluster-1445.16253|Cluster-1445.26775|Cluster-1445.3297|Cluster-1445.16370|Cluster-1445.11405|Cluster-1445.26125|Cluster-1445.14732|Cluster-1445.19224
KEGG	ko05332	Graft-versus-host disease	12|1559	28|5842	0.101745	0.831739	12	Cluster-1445.2421|Cluster-1445.18829|Cluster-1445.15405|Cluster-1445.14090|Cluster-1445.11552|Cluster-1445.7991|Cluster-1445.19317|Cluster-1445.23705|Cluster-1445.16089|Cluster-1445.8892|Cluster-1445.8382|Cluster-1445.14064
KEGG	ko01040	Biosynthesis of unsaturated fatty acids	11|1559	25|5842	0.102596	0.831739	11	Cluster-1445.14037|Cluster-1445.21069|Cluster-1445.4241|Cluster-1445.13995|Cluster-1445.8326|Cluster-1445.15029|Cluster-1445.13371|Cluster-1445.15180|Cluster-1445.21497|Cluster-1445.24432|Cluster-1445.18293
KEGG	ko05168	Herpes simplex infection	53|1559	166|5842	0.102751	0.831739	53	Cluster-1445.18194|Cluster-1445.18829|Cluster-1445.17659|Cluster-1445.23887|Cluster-1445.11552|Cluster-1445.7991|Cluster-1445.14096|Cluster-1445.12365|Cluster-1445.21883|Cluster-1445.23888|Cluster-1445.14090|Cluster-1445.15525|Cluster-1445.12074|Cluster-1445.12845|Cluster-1445.27485|Cluster-1445.11797|Cluster-1445.16831|Cluster-1445.4537|Cluster-1445.8892|Cluster-5277.0|Cluster-1445.20256|Cluster…
KEGG	ko05323	Rheumatoid arthritis	27|1559	77|5842	0.106405	0.831739	27	Cluster-1445.18829|Cluster-1445.11552|Cluster-1445.12275|Cluster-1445.12365|Cluster-1445.14090|Cluster-1445.29033|Cluster-6240.0|Cluster-1445.20252|Cluster-1445.12191|Cluster-1445.23705|Cluster-1445.18303|Cluster-1445.19337|Cluster-1445.19317|Cluster-1445.19176|Cluster-1445.16060|Cluster-1445.28631|Cluster-1445.8892|Cluster-1445.30255|Cluster-1445.7435|Cluster-1445.15405|Cluster-1445.4509|Cluster…
KEGG	ko04672	Intestinal immune network for IgA production	16|1559	41|5842	0.10822	0.831739	16	Cluster-1445.8892|Cluster-1445.18829|Cluster-1445.15405|Cluster-1445.29033|Cluster-1445.19317|Cluster-1445.10909|Cluster-1445.11552|Cluster-1445.4509|Cluster-1445.6094|Cluster-1445.27456|Cluster-1445.24578|Cluster-1445.23705|Cluster-1445.14090|Cluster-1445.8237|Cluster-1445.11476|Cluster-1445.20053
KEGG	ko05330	Allograft rejection	15|1559	38|5842	0.110899	0.831739	15	Cluster-1445.2421|Cluster-1445.18829|Cluster-1445.15405|Cluster-1445.29033|Cluster-1445.14090|Cluster-1445.11552|Cluster-1445.4509|Cluster-1445.7991|Cluster-1445.19317|Cluster-1445.24578|Cluster-1445.23705|Cluster-1445.16089|Cluster-1445.8892|Cluster-1445.8382|Cluster-1445.14064
KEGG	ko05320	Autoimmune thyroid disease	15|1559	38|5842	0.110899	0.831739	15	Cluster-1445.2421|Cluster-1445.18829|Cluster-1445.15405|Cluster-1445.29033|Cluster-1445.14090|Cluster-1445.11552|Cluster-1445.4509|Cluster-1445.7991|Cluster-1445.19317|Cluster-1445.24578|Cluster-1445.23705|Cluster-1445.16089|Cluster-1445.8892|Cluster-1445.8382|Cluster-1445.14064
KEGG	ko04711	Circadian rhythm - fly	6|1559	11|5842	0.116507	0.854383	6	Cluster-1445.11797|Cluster-1445.21094|Cluster-1445.8019|Cluster-1445.23888|Cluster-1445.9387|Cluster-1445.23887
KEGG	ko04080	Neuroactive ligand-receptor interaction	44|1559	138|5842	0.128747	0.923621	44	Cluster-1445.17516|Cluster-1445.7898|Cluster-1445.3682|Cluster-1445.13653|Cluster-1445.9359|Cluster-1445.12320|Cluster-1445.3520|Cluster-1445.14079|Cluster-11443.0|Cluster-1445.10303|Cluster-1445.4168|Cluster-1445.10003|Cluster-1445.20241|Cluster-1445.11850|Cluster-1445.27313|Cluster-1445.25912|Cluster-1445.2519|Cluster-1445.24394|Cluster-1445.19450|Cluster-1445.30723|Cluster-1363.0|Cluster-1445.…
KEGG	ko01524	Platinum drug resistance	28|1559	84|5842	0.144743	0.999923	28	Cluster-1445.21718|Cluster-1445.18194|Cluster-1445.17712|Cluster-1445.14101|Cluster-1445.14266|Cluster-1445.19493|Cluster-1445.24986|Cluster-1445.4275|Cluster-1445.18014|Cluster-1445.10950|Cluster-1445.9192|Cluster-1445.16642|Cluster-1445.2713|Cluster-1445.14815|Cluster-1445.18182|Cluster-1445.21539|Cluster-1445.5699|Cluster-1445.17173|Cluster-1445.17156|Cluster-1445.9900|Cluster-1445.6751|Cluste…
KEGG	ko04115	p53 signaling pathway	21|1559	61|5842	0.156719	0.999923	21	Cluster-1445.8382|Cluster-1445.14902|Cluster-1445.20047|Cluster-1445.16195|Cluster-1445.26001|Cluster-1445.17156|Cluster-1445.12730|Cluster-1445.16157|Cluster-1445.971|Cluster-1445.2010|Cluster-1445.14101|Cluster-1445.12727|Cluster-1445.22614|Cluster-1445.18251|Cluster-1445.5853|Cluster-1445.7988|Cluster-1445.22372|Cluster-1445.3713|Cluster-1445.8402|Cluster-1445.2023|Cluster-1445.9451
KEGG	ko00350	Tyrosine metabolism	11|1559	28|5842	0.160062	0.999923	11	Cluster-1445.21841|Cluster-1445.16209|Cluster-1445.17852|Cluster-6804.0|Cluster-1445.19703|Cluster-1445.17332|Cluster-1445.24364|Cluster-1445.16564|Cluster-1445.21756|Cluster-1445.16018|Cluster-1445.17476
KEGG	ko05200	Pathways in cancer	113|1559	393|5842	0.165487	0.999923	113	Cluster-1445.17160|Cluster-1445.24628|Cluster-1445.11923|Cluster-1445.29041|Cluster-1445.18664|Cluster-1445.18172|Cluster-1445.25513|Cluster-1445.24986|Cluster-1445.360|Cluster-1445.26438|Cluster-1445.20583|Cluster-1445.11071|Cluster-1445.16476|Cluster-1445.14815|Cluster-1445.10186|Cluster-1445.7018|Cluster-1445.26468|Cluster-1445.9537|Cluster-1445.14950|Cluster-1445.10174|Cluster-1445.15799|Clus…
KEGG	ko00430	Taurine and hypotaurine metabolism	4|1559	7|5842	0.172777	0.999923	4	Cluster-1445.3265|Cluster-1445.5006|Cluster-1445.18333|Cluster-1445.17422
KEGG	ko00450	Selenocompound metabolism	7|1559	16|5842	0.17617	0.999923	7	Cluster-1445.1762|Cluster-1445.15731|Cluster-1445.19275|Cluster-1445.18363|Cluster-1445.15706|Cluster-1445.8658|Cluster-1445.10845
KEGG	ko04810	Regulation of actin cytoskeleton	68|1559	230|5842	0.178098	0.999923	68	Cluster-1445.6297|Cluster-1445.24406|Cluster-1445.23112|Cluster-1445.9273|Cluster-1445.20826|Cluster-1445.10527|Cluster-1445.18824|Cluster-1445.3221|Cluster-1445.6195|Cluster-1445.29499|Cluster-1445.10223|Cluster-1445.13733|Cluster-1445.13204|Cluster-1445.4181|Cluster-1445.7420|Cluster-1445.11923|Cluster-1445.27591|Cluster-1445.14559|Cluster-1445.18461|Cluster-1445.22920|Cluster-1445.14191|Cluste…
KEGG	ko00604	Glycosphingolipid biosynthesis - ganglio series	6|1559	13|5842	0.178169	0.999923	6	Cluster-1445.17044|Cluster-1445.18025|Cluster-1445.20672|Cluster-1445.17577|Cluster-1445.25631|Cluster-1445.12773
KEGG	ko00600	Sphingolipid metabolism	14|1559	39|5842	0.183608	0.999923	14	Cluster-1445.1858|Cluster-1445.14166|Cluster-1445.19526|Cluster-1445.17408|Cluster-1445.20672|Cluster-1445.20866|Cluster-1445.22888|Cluster-1445.3868|Cluster-1445.17243|Cluster-1445.26044|Cluster-1445.17814|Cluster-1445.12361|Cluster-1445.17389|Cluster-1445.3066
KEGG	ko00903	Limonene and pinene degradation	2|1559	2|5842	0.188827	0.999923	2	Cluster-1445.14970|Cluster-1445.17899
KEGG	ko04142	Lysosome	37|1559	120|5842	0.19586	0.999923	37	Cluster-1445.25830|Cluster-1445.17271|Cluster-1445.12275|Cluster-1445.15835|Cluster-1445.19884|Cluster-1445.20507|Cluster-3100.0|Cluster-1445.2458|Cluster-1445.20563|Cluster-1445.15088|Cluster-1445.22710|Cluster-1445.11074|Cluster-1445.18303|Cluster-1445.16081|Cluster-1445.4039|Cluster-1445.26879|Cluster-1445.20672|Cluster-1445.15862|Cluster-1445.14917|Cluster-1445.21876|Cluster-1445.6036|Cluster…
KEGG	ko00511	Other glycan degradation	8|1559	20|5842	0.201162	0.999923	8	Cluster-1445.18025|Cluster-1445.26879|Cluster-1445.20672|Cluster-1445.9442|Cluster-1445.17986|Cluster-1445.596|Cluster-1445.14882|Cluster-1445.17818
KEGG	ko04726	Serotonergic synapse	27|1559	85|5842	0.202269	0.999923	27	Cluster-1445.2560|Cluster-1445.10509|Cluster-1445.21711|Cluster-1445.17160|Cluster-1445.12257|Cluster-1445.16385|Cluster-1445.24989|Cluster-1445.18502|Cluster-1445.28256|Cluster-1445.13501|Cluster-1445.19216|Cluster-1445.24424|Cluster-1445.4138|Cluster-1445.13463|Cluster-1445.333|Cluster-1445.332|Cluster-1445.12354|Cluster-1445.12839|Cluster-1445.8225|Cluster-1445.24801|Cluster-1445.16018|Cluster…
KEGG	ko00533	Glycosaminoglycan biosynthesis - keratan sulfate	6|1559	14|5842	0.213025	0.999923	6	Cluster-1445.10606|Cluster-1445.8746|Cluster-1445.7684|Cluster-1445.17577|Cluster-1445.21438|Cluster-1445.14852
KEGG	ko05310	Asthma	10|1559	27|5842	0.21372	0.999923	10	Cluster-1445.18829|Cluster-1445.15405|Cluster-1445.29033|Cluster-1445.19317|Cluster-1445.11552|Cluster-1445.4509|Cluster-1445.24578|Cluster-1445.23705|Cluster-1445.14090|Cluster-1445.8892
KEGG	ko00920	Sulfur metabolism	4|1559	8|5842	0.219371	0.999923	4	Cluster-1445.21963|Cluster-1445.26091|Cluster-1445.16639|Cluster-1445.15706
KEGG	ko05143	African trypanosomiasis	12|1559	34|5842	0.220924	0.999923	12	Cluster-1445.8382|Cluster-1445.29033|Cluster-1445.2003|Cluster-1445.13325|Cluster-1445.4509|Cluster-1445.24635|Cluster-1445.24578|Cluster-1445.12257|Cluster-1445.24628|Cluster-1445.24570|Cluster-1445.18845|Cluster-1445.27913
KEGG	ko04978	Mineral absorption	14|1559	41|5842	0.225023	0.999923	14	Cluster-1445.20090|Cluster-1445.27633|Cluster-1445.4256|Cluster-1445.16642|Cluster-1445.6369|Cluster-1445.20560|Cluster-1445.6368|Cluster-1445.8393|Cluster-1445.21974|Cluster-1445.16524|Cluster-1445.18046|Cluster-1445.14672|Cluster-1445.13724|Cluster-1445.10428
KEGG	ko04612	Antigen processing and presentation	16|1559	48|5842	0.227177	0.999923	16	Cluster-1445.2421|Cluster-1445.18829|Cluster-1445.17271|Cluster-1445.18172|Cluster-1445.15405|Cluster-1445.14090|Cluster-1445.11552|Cluster-1445.7991|Cluster-1445.19317|Cluster-1445.23658|Cluster-1445.23705|Cluster-1445.16031|Cluster-1445.16089|Cluster-1445.8892|Cluster-1445.8518|Cluster-1445.14064
KEGG	ko05110	Vibrio cholerae infection	16|1559	48|5842	0.227177	0.999923	16	Cluster-1445.19337|Cluster-1445.20850|Cluster-1445.19176|Cluster-1445.26719|Cluster-1445.12275|Cluster-1445.17088|Cluster-1445.17357|Cluster-1445.16987|Cluster-1445.12257|Cluster-8679.0|Cluster-1445.24562|Cluster-1445.21960|Cluster-1445.26438|Cluster-1445.18303|Cluster-1445.16450|Cluster-1445.28631
KEGG	ko05033	Nicotine addiction	11|1559	31|5842	0.230283	0.999923	11	Cluster-1445.4138|Cluster-1445.14079|Cluster-1445.25194|Cluster-1445.23341|Cluster-1445.27313|Cluster-8977.0|Cluster-1445.29844|Cluster-1445.25912|Cluster-1445.30135|Cluster-1445.2519|Cluster-8475.0
KEGG	ko00760	Nicotinate and nicotinamide metabolism	11|1559	31|5842	0.230283	0.999923	11	Cluster-2170.0|Cluster-1445.21841|Cluster-1445.16319|Cluster-6804.0|Cluster-1445.17332|Cluster-1445.14338|Cluster-1445.17466|Cluster-1445.1902|Cluster-1445.9301|Cluster-1445.15391|Cluster-1445.27268
KEGG	ko00340	Histidine metabolism	7|1559	18|5842	0.240392	0.999923	7	Cluster-1445.18803|Cluster-1445.14799|Cluster-1445.17899|Cluster-1445.14970|Cluster-1445.22226|Cluster-1445.29758|Cluster-1445.16018
KEGG	ko00590	Arachidonic acid metabolism	25|1559	82|5842	0.265846	0.999923	25	Cluster-1445.16230|Cluster-1445.21711|Cluster-1445.4161|Cluster-1445.16968|Cluster-1445.29891|Cluster-1445.16385|Cluster-1445.24989|Cluster-1445.10015|Cluster-1445.23811|Cluster-1445.16446|Cluster-1445.19216|Cluster-1445.19575|Cluster-1445.13463|Cluster-1445.13029|Cluster-1445.16224|Cluster-1445.12354|Cluster-1445.17404|Cluster-1445.27510|Cluster-1445.24801|Cluster-1445.16097|Cluster-1445.27448|C…
KEGG	ko04710	Circadian rhythm	10|1559	29|5842	0.267932	0.999923	10	Cluster-1445.10619|Cluster-1445.11797|Cluster-1445.21676|Cluster-1445.21094|Cluster-1445.8019|Cluster-1445.23052|Cluster-1445.23888|Cluster-1445.9387|Cluster-1445.23887|Cluster-1445.25868
KEGG	ko00643	Styrene degradation	2|1559	3|5842	0.273403	0.999923	2	Cluster-1445.16209|Cluster-1445.24364
KEGG	ko01220	Degradation of aromatic compounds	2|1559	3|5842	0.273403	0.999923	2	Cluster-1445.18409|Cluster-1445.18533
KEGG	ko00290	Valine, leucine and isoleucine biosynthesis	2|1559	3|5842	0.273403	0.999923	2	Cluster-1445.19825|Cluster-1445.13435
KEGG	ko00900	Terpenoid backbone biosynthesis	7|1559	19|5842	0.274955	0.999923	7	Cluster-1445.15886|Cluster-1445.14622|Cluster-1445.8849|Cluster-1445.17571|Cluster-1445.18917|Cluster-1445.22114|Cluster-1445.24254
KEGG	ko02024	Quorum sensing	3|1559	6|5842	0.275612	0.999923	3	Cluster-1445.13519|Cluster-1445.16755|Cluster-1445.27719
KEGG	ko04015	Rap1 signaling pathway	62|1559	219|5842	0.280326	0.999923	62	Cluster-1445.27964|Cluster-1445.1504|Cluster-1445.10910|Cluster-1445.16168|Cluster-1445.24139|Cluster-1445.20826|Cluster-1445.16060|Cluster-1445.17160|Cluster-1445.20397|Cluster-1445.10223|Cluster-1445.18659|Cluster-1445.5921|Cluster-1445.13204|Cluster-1445.18619|Cluster-1445.16589|Cluster-1445.6483|Cluster-1445.17890|Cluster-1445.11923|Cluster-1445.27591|Cluster-1445.5435|Cluster-1445.12493|Clus…
KEGG	ko04670	Leukocyte transendothelial migration	32|1559	109|5842	0.290504	0.999923	32	Cluster-1445.27964|Cluster-1445.17514|Cluster-1445.23119|Cluster-1445.24139|Cluster-1445.17160|Cluster-1445.10223|Cluster-1445.8237|Cluster-1445.13733|Cluster-1445.4181|Cluster-1445.24966|Cluster-4709.0|Cluster-1445.14266|Cluster-1445.11371|Cluster-1445.3396|Cluster-1445.29501|Cluster-1445.18985|Cluster-1445.9799|Cluster-1445.24531|Cluster-9716.0|Cluster-1445.547|Cluster-1445.7435|Cluster-1445.26…
KEGG	ko00062	Fatty acid elongation	8|1559	23|5842	0.295036	0.999923	8	Cluster-1445.14037|Cluster-1445.4241|Cluster-1445.13995|Cluster-1445.22679|Cluster-1445.15029|Cluster-1445.15180|Cluster-1445.15088|Cluster-1445.18293
KEGG	ko04210	Apoptosis	36|1559	124|5842	0.295088	0.999923	36	Cluster-1445.27846|Cluster-1445.18194|Cluster-1445.11495|Cluster-1445.20953|Cluster-1445.14101|Cluster-1445.4040|Cluster-1445.14266|Cluster-1445.24740|Cluster-1445.19493|Cluster-1445.26001|Cluster-1445.12845|Cluster-1445.24986|Cluster-1445.971|Cluster-1445.11139|Cluster-1445.20563|Cluster-1445.18208|Cluster-1445.23107|Cluster-1445.14815|Cluster-1445.5694|Cluster-1445.18182|Cluster-1445.2536|Clust…
KEGG	ko00380	Tryptophan metabolism	12|1559	37|5842	0.295605	0.999923	12	Cluster-1445.1762|Cluster-1445.16018|Cluster-1445.21841|Cluster-1445.17332|Cluster-1445.13325|Cluster-6804.0|Cluster-1445.23466|Cluster-1445.28767|Cluster-1445.17899|Cluster-1445.14970|Cluster-1445.24635|Cluster-1445.27913
KEGG	ko01212	Fatty acid metabolism	17|1559	55|5842	0.299587	0.999923	17	Cluster-1445.21069|Cluster-1445.16664|Cluster-1445.27719|Cluster-1445.7401|Cluster-1445.13519|Cluster-1445.4241|Cluster-1445.22679|Cluster-1445.16755|Cluster-1445.21497|Cluster-1445.15180|Cluster-1445.15088|Cluster-1445.12631|Cluster-1445.8326|Cluster-1445.3811|Cluster-1445.24432|Cluster-1445.10034|Cluster-1445.13371
KEGG	ko00130	Ubiquinone and other terpenoid-quinone biosynthesis	5|1559	13|5842	0.303377	0.999923	5	Cluster-1445.14008|Cluster-1445.21283|Cluster-1445.21756|Cluster-1445.13456|Cluster-1445.17476
KEGG	ko04933	AGE-RAGE signaling pathway in diabetic complications	29|1559	99|5842	0.306092	0.999923	29	Cluster-1445.12278|Cluster-1445.4069|Cluster-1445.10522|Cluster-1445.10186|Cluster-1445.8040|Cluster-1445.12257|Cluster-1445.23331|Cluster-1445.22025|Cluster-1445.4612|Cluster-1445.20995|Cluster-5010.1|Cluster-1445.24966|Cluster-1445.5417|Cluster-1445.14266|Cluster-1445.20252|Cluster-1445.12946|Cluster-1445.3396|Cluster-1445.22614|Cluster-1445.23508|Cluster-1445.16476|Cluster-1445.12320|Cluster-1…
KEGG	ko00410	beta-Alanine metabolism	7|1559	20|5842	0.310673	0.999923	7	Cluster-1445.10325|Cluster-1445.17899|Cluster-1445.18803|Cluster-1445.9182|Cluster-1445.16953|Cluster-1445.14970|Cluster-1445.19703
KEGG	ko00512	Mucin type O-Glycan biosynthesis	9|1559	27|5842	0.31169	0.999923	9	Cluster-1445.23656|Cluster-1445.7632|Cluster-1445.2869|Cluster-1445.8770|Cluster-4380.0|Cluster-1445.17577|Cluster-1445.24581|Cluster-1445.17757|Cluster-8304.0
KEGG	ko00603	Glycosphingolipid biosynthesis - globo series	4|1559	10|5842	0.319785	0.999923	4	Cluster-1445.25631|Cluster-1445.8907|Cluster-1445.17577|Cluster-1445.18025
KEGG	ko04727	GABAergic synapse	20|1559	67|5842	0.323054	0.999923	20	Cluster-1445.4138|Cluster-1445.6605|Cluster-1445.333|Cluster-1445.332|Cluster-1445.10509|Cluster-1445.27313|Cluster-11139.0|Cluster-1445.28256|Cluster-1445.17160|Cluster-1445.23341|Cluster-1445.29844|Cluster-1445.8225|Cluster-1445.12257|Cluster-1445.22308|Cluster-1445.18542|Cluster-1445.26438|Cluster-1445.24424|Cluster-1445.30135|Cluster-1445.15378|Cluster-1445.20241
KEGG	ko04976	Bile secretion	19|1559	64|5842	0.336486	0.999923	19	Cluster-1445.6369|Cluster-1445.8393|Cluster-1445.6385|Cluster-9089.0|Cluster-11139.0|Cluster-1445.13691|Cluster-1445.16809|Cluster-1445.17855|Cluster-1445.6368|Cluster-1445.17232|Cluster-1445.17808|Cluster-1445.18046|Cluster-1445.2674|Cluster-1445.26438|Cluster-1445.1511|Cluster-1445.16287|Cluster-1445.26329|Cluster-1445.2404|Cluster-1445.18083
KEGG	ko00460	Cyanoamino acid metabolism	3|1559	7|5842	0.337953	0.999923	3	Cluster-1445.18004|Cluster-1445.5006|Cluster-1445.18333
KEGG	ko00591	Linoleic acid metabolism	11|1559	35|5842	0.338075	0.999923	11	Cluster-1445.16385|Cluster-1445.13463|Cluster-1445.27448|Cluster-1445.12354|Cluster-1445.13029|Cluster-1445.17952|Cluster-1445.23811|Cluster-1445.19216|Cluster-1445.24801|Cluster-1445.16097|Cluster-1445.29891
KEGG	ko03008	Ribosome biogenesis in eukaryotes	23|1559	79|5842	0.342336	0.999923	23	Cluster-1445.22513|Cluster-1445.10225|Cluster-1445.8046|Cluster-1445.8047|Cluster-1445.17597|Cluster-1445.3559|Cluster-1408.0|Cluster-1445.21332|Cluster-1445.27554|Cluster-1445.5141|Cluster-1445.18325|Cluster-1445.11131|Cluster-1445.20657|Cluster-1445.16552|Cluster-1445.20132|Cluster-1445.14915|Cluster-1445.26209|Cluster-1445.23894|Cluster-1445.6631|Cluster-1445.9875|Cluster-1445.25156|Cluster-14…
KEGG	ko04630	Jak-STAT signaling pathway	32|1559	113|5842	0.352779	0.999923	32	Cluster-1445.11495|Cluster-1445.14902|Cluster-1445.21841|Cluster-1445.538|Cluster-1445.10303|Cluster-10481.0|Cluster-1445.12152|Cluster-1445.12074|Cluster-1445.17332|Cluster-1445.26360|Cluster-1445.4537|Cluster-1445.14266|Cluster-1445.20256|Cluster-1445.9312|Cluster-1445.12192|Cluster-1445.11077|Cluster-1445.16995|Cluster-1445.12884|Cluster-1445.27854|Cluster-1445.26875|Cluster-6804.0|Cluster-144…
KEGG	ko04972	Pancreatic secretion	22|1559	76|5842	0.355705	0.999923	22	Cluster-1445.23309|Cluster-1445.4040|Cluster-1445.24950|Cluster-1445.29891|Cluster-1445.15743|Cluster-1445.6369|Cluster-1445.6368|Cluster-1445.3682|Cluster-1445.23811|Cluster-1445.26438|Cluster-11139.0|Cluster-5635.0|Cluster-1445.21960|Cluster-1445.1902|Cluster-1445.16280|Cluster-1445.24636|Cluster-1445.8393|Cluster-1445.26670|Cluster-1445.18046|Cluster-1445.12257|Cluster-1445.26719|Cluster-1247.0
KEGG	ko00625	Chloroalkane and chloroalkene degradation	2|1559	4|5842	0.357435	0.999923	2	Cluster-1445.14970|Cluster-1445.17899
KEGG	ko00930	Caprolactam degradation	2|1559	4|5842	0.357435	0.999923	2	Cluster-1445.18409|Cluster-1445.18533
KEGG	ko04713	Circadian entrainment	26|1559	91|5842	0.358635	0.999923	26	Cluster-1445.10509|Cluster-1445.9359|Cluster-1445.21094|Cluster-1445.17160|Cluster-1445.14079|Cluster-1445.25912|Cluster-1445.12362|Cluster-1445.13464|Cluster-11139.0|Cluster-1445.28256|Cluster-1445.4040|Cluster-1445.26438|Cluster-1445.24424|Cluster-1445.333|Cluster-1445.332|Cluster-8977.0|Cluster-1445.8225|Cluster-1445.2519|Cluster-8475.0|Cluster-1445.6605|Cluster-1445.12839|Cluster-1445.29634|C…
KEGG	ko04966	Collecting duct acid secretion	8|1559	25|5842	0.362443	0.999923	8	Cluster-1445.13845|Cluster-1445.19337|Cluster-1445.19176|Cluster-1445.12275|Cluster-1445.17088|Cluster-1445.28631|Cluster-1445.18303|Cluster-8679.0
KEGG	ko05130	Pathogenic Escherichia coli infection	14|1559	47|5842	0.367006	0.999923	14	Cluster-1445.23112|Cluster-1445.14559|Cluster-1445.9948|Cluster-1445.24531|Cluster-1445.26449|Cluster-1445.17874|Cluster-1445.17128|Cluster-1445.16987|Cluster-1445.12257|Cluster-1445.14950|Cluster-1445.4181|Cluster-1445.16023|Cluster-1445.4206|Cluster-1445.16450
KEGG	ko00330	Arginine and proline metabolism	14|1559	47|5842	0.367006	0.999923	14	Cluster-1445.28136|Cluster-5243.0|Cluster-1445.16182|Cluster-1445.10325|Cluster-1445.17899|Cluster-1445.18803|Cluster-1445.15973|Cluster-1445.15204|Cluster-2963.0|Cluster-1445.17150|Cluster-1445.14970|Cluster-1445.6427|Cluster-1445.22453|Cluster-1445.18438
KEGG	ko00944	Flavone and flavonol biosynthesis	1|1559	1|5842	0.368314	0.999923	1	Cluster-1445.6036
KEGG	ko00901	Indole alkaloid biosynthesis	1|1559	1|5842	0.368314	0.999923	1	Cluster-1445.16018
KEGG	ko00965	Betalain biosynthesis	1|1559	1|5842	0.368314	0.999923	1	Cluster-1445.16018
KEGG	ko00910	Nitrogen metabolism	4|1559	11|5842	0.371411	0.999923	4	Cluster-1445.5494|Cluster-1445.28789|Cluster-736.0|Cluster-1445.12806
KEGG	ko00790	Folate biosynthesis	4|1559	11|5842	0.371411	0.999923	4	Cluster-1445.26844|Cluster-1445.18739|Cluster-1445.3365|Cluster-1445.17407
KEGG	ko05032	Morphine addiction	23|1559	81|5842	0.38061	0.999923	23	Cluster-1445.20646|Cluster-1445.10509|Cluster-1445.17160|Cluster-1445.12257|Cluster-1445.15655|Cluster-1445.29844|Cluster-1445.27313|Cluster-1445.332|Cluster-1445.30696|Cluster-1445.26438|Cluster-1445.24424|Cluster-1445.4138|Cluster-1445.27831|Cluster-1445.333|Cluster-11139.0|Cluster-1445.23341|Cluster-1445.8225|Cluster-1445.15086|Cluster-1445.13443|Cluster-1445.25175|Cluster-1445.12839|Cluster-1…
KEGG	ko05321	Inflammatory bowel disease (IBD)	13|1559	44|5842	0.384547	0.999923	13	Cluster-1445.10619|Cluster-1445.29801|Cluster-1445.18829|Cluster-1445.15405|Cluster-1445.16476|Cluster-1445.19317|Cluster-1445.11552|Cluster-1445.8892|Cluster-1445.8040|Cluster-1445.12365|Cluster-1445.23705|Cluster-1445.14090|Cluster-1445.6634
KEGG	ko00072	Synthesis and degradation of ketone bodies	3|1559	8|5842	0.399894	0.999923	3	Cluster-1445.15886|Cluster-1445.17153|Cluster-1445.8849
KEGG	ko04744	Phototransduction	3|1559	8|5842	0.399894	0.999923	3	Cluster-4560.0|Cluster-1445.23897|Cluster-1445.26956
KEGG	ko00240	Pyrimidine metabolism	28|1559	101|5842	0.40316	0.999923	28	Cluster-2170.0|Cluster-1445.13756|Cluster-1445.9503|Cluster-9244.0|Cluster-1445.10436|Cluster-7380.0|Cluster-1445.15292|Cluster-1445.15003|Cluster-1445.5992|Cluster-1445.12730|Cluster-1445.19993|Cluster-1445.22271|Cluster-1445.12869|Cluster-1445.6690|Cluster-1445.10978|Cluster-1445.9691|Cluster-1445.16263|Cluster-1445.16953|Cluster-1445.25452|Cluster-1445.5201|Cluster-1445.9148|Cluster-1445.14338…
KEGG	ko00052	Galactose metabolism	9|1559	30|5842	0.407271	0.999923	9	Cluster-1445.15854|Cluster-1445.11728|Cluster-1445.24306|Cluster-1445.19420|Cluster-1445.7684|Cluster-1445.17023|Cluster-1445.19106|Cluster-1445.20672|Cluster-1445.28081
KEGG	ko05020	Prion diseases	9|1559	30|5842	0.407271	0.999923	9	Cluster-1445.19066|Cluster-1445.2707|Cluster-1445.4067|Cluster-1445.4945|Cluster-1445.27651|Cluster-1445.4043|Cluster-1445.18049|Cluster-1445.2351|Cluster-1445.15081
KEGG	ko00620	Pyruvate metabolism	11|1559	38|5842	0.424109	0.999923	11	Cluster-1445.13778|Cluster-1445.16774|Cluster-1445.18592|Cluster-1445.14970|Cluster-1445.5162|Cluster-1445.19914|Cluster-1445.16664|Cluster-1445.17899|Cluster-1445.13908|Cluster-1445.25992|Cluster-1445.24860
KEGG	ko04973	Carbohydrate digestion and absorption	12|1559	42|5842	0.431043	0.999923	12	Cluster-1445.6605|Cluster-1445.6369|Cluster-1445.6368|Cluster-1445.11728|Cluster-1445.28256|Cluster-1445.14266|Cluster-1445.21405|Cluster-1445.8393|Cluster-1445.18046|Cluster-1445.19106|Cluster-1445.19420|Cluster-1445.28081
KEGG	ko04666	Fc gamma R-mediated phagocytosis	27|1559	99|5842	0.435017	0.999923	27	Cluster-1445.1858|Cluster-1445.12278|Cluster-1445.23112|Cluster-1445.9273|Cluster-1445.10223|Cluster-1445.12257|Cluster-1445.11923|Cluster-1445.14559|Cluster-1445.29033|Cluster-1445.26513|Cluster-1445.19994|Cluster-1445.14266|Cluster-1445.20214|Cluster-1445.8243|Cluster-9716.0|Cluster-1445.17243|Cluster-1445.1951|Cluster-1445.13517|Cluster-1445.24406|Cluster-1445.4509|Cluster-1445.22435|Cluster-1…
KEGG	ko00071	Fatty acid degradation	13|1559	46|5842	0.437255	0.999923	13	Cluster-1445.21069|Cluster-1445.27719|Cluster-1445.17852|Cluster-1445.13519|Cluster-1445.18784|Cluster-1445.3811|Cluster-1445.14970|Cluster-1445.16755|Cluster-1445.17899|Cluster-1445.12631|Cluster-1445.16564|Cluster-1445.24432|Cluster-1445.10034
KEGG	ko00061	Fatty acid biosynthesis	5|1559	16|5842	0.437851	0.999923	5	Cluster-1445.13519|Cluster-1445.16755|Cluster-1445.7401|Cluster-1445.16664|Cluster-1445.27719
KEGG	ko04622	RIG-I-like receptor signaling pathway	14|1559	50|5842	0.442878	0.999923	14	Cluster-1445.18194|Cluster-1445.21418|Cluster-1445.17259|Cluster-1445.23996|Cluster-1445.13684|Cluster-1445.12771|Cluster-1445.3396|Cluster-1445.11114|Cluster-1445.8640|Cluster-1445.8176|Cluster-1445.23510|Cluster-1445.7475|Cluster-1445.25420|Cluster-1445.13110
KEGG	ko00670	One carbon pool by folate	6|1559	20|5842	0.449051	0.999923	6	Cluster-1445.13660|Cluster-1445.24316|Cluster-1445.21048|Cluster-1445.19601|Cluster-1445.22226|Cluster-1445.3365
KEGG	ko05219	Bladder cancer	11|1559	39|5842	0.452918	0.999923	11	Cluster-1445.29634|Cluster-1445.5634|Cluster-1445.16195|Cluster-1445.24966|Cluster-1445.20252|Cluster-1445.24457|Cluster-1445.18659|Cluster-1445.18298|Cluster-1445.6690|Cluster-1445.15378|Cluster-1445.12362
KEGG	ko04970	Salivary secretion	22|1559	81|5842	0.455159	0.999923	22	Cluster-1445.14393|Cluster-1445.9937|Cluster-1445.12257|Cluster-1445.24950|Cluster-1445.15743|Cluster-1445.14711|Cluster-1445.6369|Cluster-1445.6368|Cluster-1445.22692|Cluster-1445.13464|Cluster-1445.23309|Cluster-1445.26438|Cluster-11139.0|Cluster-1445.30723|Cluster-1445.21960|Cluster-1445.1902|Cluster-1445.16280|Cluster-1445.24636|Cluster-1445.8393|Cluster-1445.18673|Cluster-1445.18046|Cluster-…
KEGG	ko00563	Glycosylphosphatidylinositol(GPI)-anchor biosynthesis	7|1559	24|5842	0.457891	0.999923	7	Cluster-1445.14057|Cluster-1445.16170|Cluster-1445.9774|Cluster-1445.15399|Cluster-1445.11054|Cluster-1445.13377|Cluster-1445.20262
KEGG	ko04913	Ovarian steroidogenesis	12|1559	43|5842	0.458527	0.999923	12	Cluster-1445.13463|Cluster-1445.16168|Cluster-1445.27448|Cluster-1445.24989|Cluster-1445.24355|Cluster-11139.0|Cluster-8953.0|Cluster-1445.20561|Cluster-1445.26438|Cluster-1445.16968|Cluster-1445.10372|Cluster-1445.10002
KEGG	ko00280	Valine, leucine and isoleucine degradation	13|1559	47|5842	0.46358	0.999923	13	Cluster-1445.15886|Cluster-1445.21069|Cluster-1445.20013|Cluster-1445.25071|Cluster-6804.0|Cluster-1445.21841|Cluster-1445.8849|Cluster-1445.19825|Cluster-1445.17899|Cluster-1445.14970|Cluster-1445.17153|Cluster-1445.24432|Cluster-1445.17332
KEGG	ko05014	Amyotrophic lateral sclerosis (ALS)	13|1559	47|5842	0.46358	0.999923	13	Cluster-1445.14815|Cluster-1445.2351|Cluster-1445.18182|Cluster-1445.22987|Cluster-8977.0|Cluster-1445.14101|Cluster-1445.17156|Cluster-1445.18217|Cluster-1445.3396|Cluster-1445.19493|Cluster-1445.2519|Cluster-1445.17890|Cluster-8475.0
KEGG	ko05410	Hypertrophic cardiomyopathy (HCM)	23|1559	86|5842	0.4782	0.999923	23	Cluster-1445.21676|Cluster-1445.22971|Cluster-1445.13494|Cluster-1445.13711|Cluster-1445.29499|Cluster-1445.15814|Cluster-1445.28256|Cluster-1445.6094|Cluster-1445.23052|Cluster-1445.6793|Cluster-1445.21771|Cluster-1445.21897|Cluster-1445.16556|Cluster-1445.10527|Cluster-1445.9450|Cluster-1445.7460|Cluster-1445.6605|Cluster-1445.22920|Cluster-1445.16823|Cluster-1445.10166|Cluster-1445.16987|Clust…
KEGG	ko04920	Adipocytokine signaling pathway	18|1559	67|5842	0.483322	0.999923	18	Cluster-1445.1083|Cluster-1445.8068|Cluster-1445.21676|Cluster-1445.3951|Cluster-1445.27719|Cluster-1445.13519|Cluster-1445.23543|Cluster-1445.10305|Cluster-1445.16755|Cluster-1445.19420|Cluster-950.0|Cluster-1445.14947|Cluster-1445.23052|Cluster-1445.12631|Cluster-1445.3811|Cluster-1445.10034|Cluster-1445.28081|Cluster-1445.13110
KEGG	ko00601	Glycosphingolipid biosynthesis - lacto and neolacto series	6|1559	21|5842	0.488588	0.999923	6	Cluster-1445.10606|Cluster-1445.4044|Cluster-1445.7684|Cluster-1445.20924|Cluster-1445.14852|Cluster-1445.25631
KEGG	ko04962	Vasopressin-regulated water reabsorption	13|1559	48|5842	0.489736	0.999923	13	Cluster-1445.1861|Cluster-1445.18746|Cluster-1445.3438|Cluster-1445.28755|Cluster-1445.14393|Cluster-1445.21713|Cluster-1445.13849|Cluster-1445.17344|Cluster-1445.3518|Cluster-1445.23927|Cluster-1445.10450|Cluster-1445.6895|Cluster-1445.26438
KEGG	ko04721	Synaptic vesicle cycle	14|1559	52|5842	0.493316	0.999923	14	Cluster-1445.4138|Cluster-1445.19337|Cluster-1445.16824|Cluster-1445.14393|Cluster-1445.19176|Cluster-1445.12275|Cluster-1445.17088|Cluster-1445.29844|Cluster-1445.25470|Cluster-8679.0|Cluster-1445.19884|Cluster-1445.18303|Cluster-1445.19860|Cluster-1445.28631
KEGG	ko00909	Sesquiterpenoid and triterpenoid biosynthesis	1|1559	2|5842	0.497958	0.999923	1	Cluster-1445.8529
KEGG	ko00940	Phenylpropanoid biosynthesis	1|1559	2|5842	0.497958	0.999923	1	Cluster-1445.18004
KEGG	ko00261	Monobactam biosynthesis	1|1559	2|5842	0.497958	0.999923	1	Cluster-1445.15706
KEGG	ko00780	Biotin metabolism	1|1559	2|5842	0.497958	0.999923	1	Cluster-1445.7173
KEGG	ko05164	Influenza A	35|1559	134|5842	0.506382	0.999923	35	Cluster-1445.18829|Cluster-1445.15855|Cluster-1445.11552|Cluster-1445.14101|Cluster-1445.14096|Cluster-1445.12257|Cluster-1445.14090|Cluster-1445.12074|Cluster-1445.4537|Cluster-1445.17890|Cluster-1445.12845|Cluster-1445.25378|Cluster-1445.16831|Cluster-1445.5141|Cluster-1445.14266|Cluster-1445.3396|Cluster-1445.20256|Cluster-1445.11114|Cluster-1445.8892|Cluster-1445.18208|Cluster-1445.10512|Clus…
KEGG	ko05100	Bacterial invasion of epithelial cells	20|1559	76|5842	0.510328	0.999923	20	Cluster-1445.24406|Cluster-1445.23112|Cluster-1445.14559|Cluster-1445.7376|Cluster-1445.8208|Cluster-1445.13326|Cluster-1445.10181|Cluster-1445.7160|Cluster-1445.14266|Cluster-1445.18199|Cluster-1445.1634|Cluster-1445.26468|Cluster-1445.29501|Cluster-1445.19884|Cluster-1445.16987|Cluster-1445.7769|Cluster-1445.16450|Cluster-1445.15378|Cluster-1445.20074|Cluster-1445.11923
KEGG	ko05206	MicroRNAs in cancer	39|1559	150|5842	0.513598	0.999923	39	Cluster-1445.14158|Cluster-1445.14902|Cluster-1445.13321|Cluster-1445.13538|Cluster-1445.10305|Cluster-1445.12257|Cluster-1445.12362|Cluster-1445.4181|Cluster-1445.28437|Cluster-1445.2404|Cluster-1445.11923|Cluster-1445.2478|Cluster-1445.4537|Cluster-1445.18112|Cluster-11142.0|Cluster-1445.20252|Cluster-1445.9312|Cluster-1445.7769|Cluster-1445.18659|Cluster-1445.16195|Cluster-1445.4354|Cluster-14…
KEGG	ko04520	Adherens junction	22|1559	84|5842	0.51487	0.999923	22	Cluster-1445.27964|Cluster-1445.24406|Cluster-1445.17659|Cluster-1445.13305|Cluster-1445.10223|Cluster-1445.18659|Cluster-1445.16941|Cluster-1445.21807|Cluster-1445.16168|Cluster-1445.4537|Cluster-1445.19994|Cluster-1445.11371|Cluster-1445.11039|Cluster-1445.16476|Cluster-1445.19747|Cluster-1445.22800|Cluster-1445.1067|Cluster-1445.15378|Cluster-1445.1634|Cluster-1445.3915|Cluster-1445.16987|Clus…
KEGG	ko04930	Type II diabetes mellitus	13|1559	49|5842	0.515616	0.999923	13	Cluster-1445.4138|Cluster-1445.12278|Cluster-1445.6605|Cluster-1445.3951|Cluster-1445.16168|Cluster-1445.28256|Cluster-1445.17405|Cluster-1445.14266|Cluster-1445.29844|Cluster-1445.10305|Cluster-1445.19914|Cluster-7792.0|Cluster-1445.9312
KEGG	ko05340	Primary immunodeficiency	7|1559	26|5842	0.529591	0.999923	7	Cluster-1445.1752|Cluster-1445.29033|Cluster-1445.23658|Cluster-1445.4509|Cluster-1445.24578|Cluster-1445.5059|Cluster-1445.8518
KEGG	ko04066	HIF-1 signaling pathway	25|1559	97|5842	0.539351	0.999923	25	Cluster-1445.19146|Cluster-1445.16168|Cluster-1445.11476|Cluster-1445.538|Cluster-1445.12257|Cluster-1445.6483|Cluster-1445.4256|Cluster-1445.20429|Cluster-1445.4537|Cluster-1445.14266|Cluster-1445.20252|Cluster-1445.22614|Cluster-1445.20583|Cluster-1445.9694|Cluster-1445.21081|Cluster-1445.23475|Cluster-1445.16060|Cluster-1445.5435|Cluster-1445.14672|Cluster-1445.3951|Cluster-1445.1067|Cluster-1…
KEGG	ko04022	cGMP-PKG signaling pathway	42|1559	164|5842	0.546896	0.999923	42	Cluster-1445.16168|Cluster-1445.21883|Cluster-1445.13653|Cluster-1445.12320|Cluster-1445.3520|Cluster-1445.17160|Cluster-1445.8040|Cluster-1445.10305|Cluster-1445.10450|Cluster-1445.13733|Cluster-1445.27485|Cluster-1445.24950|Cluster-1445.15743|Cluster-1445.6369|Cluster-1445.6368|Cluster-1445.21039|Cluster-1445.13464|Cluster-1445.16280|Cluster-1445.25510|Cluster-1445.28256|Cluster-1445.14266|Clus…
KEGG	ko03460	Fanconi anemia pathway	17|1559	66|5842	0.547228	0.999923	17	Cluster-1445.21123|Cluster-7041.1|Cluster-1445.22921|Cluster-1445.25822|Cluster-1445.8122|Cluster-1445.11843|Cluster-1445.25459|Cluster-1445.7350|Cluster-1445.9900|Cluster-1445.18251|Cluster-1445.8482|Cluster-1445.1631|Cluster-1445.6968|Cluster-1445.8123|Cluster-1445.22985|Cluster-1445.14603|Cluster-1445.25763
KEGG	ko05412	Arrhythmogenic right ventricular cardiomyopathy (ARVC)	21|1559	82|5842	0.552621	0.999923	21	Cluster-1445.21897|Cluster-1445.1634|Cluster-1445.2372|Cluster-1445.16823|Cluster-1445.10166|Cluster-1445.6605|Cluster-1445.22971|Cluster-1445.28256|Cluster-1445.10527|Cluster-1445.22920|Cluster-1445.6094|Cluster-1445.11371|Cluster-1445.29499|Cluster-1445.26312|Cluster-1445.9450|Cluster-1445.6793|Cluster-1445.16987|Cluster-1445.21771|Cluster-1445.15814|Cluster-1445.16450|Cluster-1445.13711
KEGG	ko04668	TNF signaling pathway	25|1559	98|5842	0.557508	0.999923	25	Cluster-1445.18194|Cluster-1445.10450|Cluster-1445.12362|Cluster-1445.19493|Cluster-1445.17890|Cluster-1445.7338|Cluster-1445.24986|Cluster-1445.14266|Cluster-1445.8382|Cluster-1445.3396|Cluster-1445.7722|Cluster-1445.29801|Cluster-1445.18182|Cluster-1445.13986|Cluster-1445.8176|Cluster-1445.30255|Cluster-1445.2003|Cluster-1445.13110|Cluster-1445.29634|Cluster-1445.1895|Cluster-1445.12857|Cluster…
KEGG	ko04530	Tight junction	34|1559	134|5842	0.567216	0.999923	34	Cluster-1445.12278|Cluster-1445.27964|Cluster-1445.23119|Cluster-1445.9799|Cluster-1445.20826|Cluster-1445.17160|Cluster-1445.13733|Cluster-1445.5921|Cluster-1445.19632|Cluster-10343.0|Cluster-1445.16026|Cluster-1445.27987|Cluster-4709.0|Cluster-1445.9842|Cluster-1445.11371|Cluster-1445.21119|Cluster-1445.24562|Cluster-1445.18985|Cluster-1445.28984|Cluster-1445.19251|Cluster-1445.24531|Cluster-14…
KEGG	ko04064	NF-kappa B signaling pathway	22|1559	87|5842	0.573023	0.999923	22	Cluster-1445.27846|Cluster-1445.8255|Cluster-1445.8176|Cluster-1445.11476|Cluster-1445.29033|Cluster-1445.24986|Cluster-1445.12191|Cluster-1445.7722|Cluster-1445.11114|Cluster-1919.0|Cluster-1445.13986|Cluster-1445.14158|Cluster-1445.25637|Cluster-1445.13110|Cluster-1445.27063|Cluster-1445.3857|Cluster-1445.26449|Cluster-1445.15701|Cluster-1445.4509|Cluster-1445.24578|Cluster-1445.24435|Cluster-1…
KEGG	ko05162	Measles	27|1559	107|5842	0.57704	0.999923	27	Cluster-1445.13684|Cluster-1445.14902|Cluster-1445.14096|Cluster-1445.12365|Cluster-1445.15813|Cluster-1445.26360|Cluster-1445.12074|Cluster-1445.29033|Cluster-1445.12845|Cluster-1445.14266|Cluster-1445.20256|Cluster-1445.1701|Cluster-1445.18208|Cluster-1445.11114|Cluster-1445.10512|Cluster-1445.8243|Cluster-1445.13986|Cluster-1445.4050|Cluster-1445.9451|Cluster-1445.8382|Cluster-1445.26520|Clust…
KEGG	ko04931	Insulin resistance	27|1559	107|5842	0.57704	0.999923	27	Cluster-1445.12278|Cluster-1445.21676|Cluster-1445.16168|Cluster-1445.20868|Cluster-1445.7896|Cluster-1445.13305|Cluster-1445.10305|Cluster-1445.10450|Cluster-1445.4656|Cluster-1445.3736|Cluster-9089.0|Cluster-1445.850|Cluster-1445.14266|Cluster-1445.23052|Cluster-10932.0|Cluster-1445.6385|Cluster-1445.18590|Cluster-1445.12631|Cluster-1445.10034|Cluster-1445.1904|Cluster-1445.3951|Cluster-1445.14…
KEGG	ko00627	Aminobenzoate degradation	2|1559	7|5842	0.579427	0.999923	2	Cluster-1445.26844|Cluster-1445.13778
KEGG	ko04122	Sulfur relay system	2|1559	7|5842	0.579427	0.999923	2	Cluster-1445.17940|Cluster-1445.13899
KEGG	ko04370	VEGF signaling pathway	16|1559	64|5842	0.590392	0.999923	16	Cluster-1445.1858|Cluster-1445.14101|Cluster-1445.14815|Cluster-1445.2225|Cluster-1445.24007|Cluster-1445.10223|Cluster-1445.26468|Cluster-1445.14266|Cluster-1445.17243|Cluster-1445.20252|Cluster-1445.3396|Cluster-1445.12257|Cluster-1445.25276|Cluster-1445.29501|Cluster-1445.6427|Cluster-1445.15378
KEGG	ko00270	Cysteine and methionine metabolism	11|1559	44|5842	0.591585	0.999923	11	Cluster-1445.18509|Cluster-1445.16370|Cluster-1445.10508|Cluster-1445.21229|Cluster-1445.13435|Cluster-1445.15204|Cluster-1445.19825|Cluster-1445.3265|Cluster-1445.15731|Cluster-1445.13502|Cluster-1445.19224
KEGG	ko03022	Basal transcription factors	10|1559	40|5842	0.592394	0.999923	10	Cluster-1445.19147|Cluster-1445.21883|Cluster-1445.21039|Cluster-1445.9935|Cluster-1445.19237|Cluster-1445.14589|Cluster-1445.15748|Cluster-1445.27485|Cluster-1445.8463|Cluster-1445.23830
KEGG	ko04014	Ras signaling pathway	49|1559	195|5842	0.593559	0.999923	49	Cluster-1445.6297|Cluster-1445.27964|Cluster-1445.1504|Cluster-1445.16168|Cluster-1445.10509|Cluster-1445.24139|Cluster-1445.20826|Cluster-1445.16060|Cluster-1445.13029|Cluster-1445.20397|Cluster-1445.10223|Cluster-1445.18659|Cluster-1445.13204|Cluster-1445.18619|Cluster-1445.8661|Cluster-1445.29891|Cluster-1445.27591|Cluster-1445.5435|Cluster-1445.25513|Cluster-1445.14266|Cluster-1445.27984|Clus…
KEGG	ko04110	Cell cycle	33|1559	132|5842	0.597126	0.999923	33	Cluster-1445.22536|Cluster-1445.26001|Cluster-1445.22994|Cluster-1445.14902|Cluster-1445.16154|Cluster-1445.13538|Cluster-1445.11255|Cluster-1445.23330|Cluster-1445.5148|Cluster-1445.27598|Cluster-1445.27599|Cluster-1445.4537|Cluster-1445.971|Cluster-1445.6961|Cluster-5261.0|Cluster-1445.11282|Cluster-1445.19453|Cluster-1445.6819|Cluster-1445.16476|Cluster-1445.4130|Cluster-1445.9451|Cluster-1445…
KEGG	ko00785	Lipoic acid metabolism	1|1559	3|5842	0.601002	0.999923	1	Cluster-1445.6558
KEGG	ko04024	cAMP signaling pathway	45|1559	180|5842	0.603847	0.999923	45	Cluster-1445.27964|Cluster-1445.20646|Cluster-1445.2722|Cluster-1445.9359|Cluster-1445.20826|Cluster-1445.17160|Cluster-1445.8040|Cluster-1445.10223|Cluster-1445.13733|Cluster-1445.14079|Cluster-1445.15655|Cluster-1445.24950|Cluster-1445.10003|Cluster-1445.6369|Cluster-1445.6368|Cluster-1445.22435|Cluster-1445.16280|Cluster-1445.4537|Cluster-1445.28256|Cluster-1445.14266|Cluster-1445.2519|Cluster…
KEGG	ko05140	Leishmaniasis	18|1559	73|5842	0.61108	0.999923	18	Cluster-1445.18829|Cluster-1445.21602|Cluster-1445.15405|Cluster-1445.29033|Cluster-1445.24578|Cluster-1445.26513|Cluster-1445.15701|Cluster-9716.0|Cluster-1445.11552|Cluster-1445.4509|Cluster-1445.13986|Cluster-1445.19317|Cluster-1445.12365|Cluster-1445.3396|Cluster-1445.23705|Cluster-1445.8352|Cluster-1445.14090|Cluster-1445.8892
KEGG	ko05213	Endometrial cancer	13|1559	53|5842	0.614541	0.999923	13	Cluster-1445.1634|Cluster-1445.14815|Cluster-1445.2478|Cluster-1445.13499|Cluster-1445.4354|Cluster-1445.14266|Cluster-1445.5502|Cluster-1445.9900|Cluster-1445.18659|Cluster-1445.7985|Cluster-1445.17426|Cluster-1445.14101|Cluster-1445.5015
KEGG	ko04724	Glutamatergic synapse	28|1559	114|5842	0.627112	0.999923	28	Cluster-1445.10509|Cluster-1445.2664|Cluster-1445.17160|Cluster-1445.14079|Cluster-1445.25912|Cluster-1445.25095|Cluster-1445.332|Cluster-1445.28256|Cluster-1445.22308|Cluster-1445.26438|Cluster-1445.24424|Cluster-1445.12948|Cluster-1445.4138|Cluster-1445.3629|Cluster-1445.4040|Cluster-1445.333|Cluster-11139.0|Cluster-8977.0|Cluster-1445.8225|Cluster-1445.4473|Cluster-1445.2519|Cluster-8475.0|Clu…
KEGG	ko04611	Platelet activation	34|1559	138|5842	0.627284	0.999923	34	Cluster-1445.21711|Cluster-1445.23508|Cluster-1445.17160|Cluster-1445.4040|Cluster-3186.0|Cluster-1445.23331|Cluster-1445.22025|Cluster-5010.1|Cluster-1445.13464|Cluster-1445.5417|Cluster-1445.14266|Cluster-1445.24848|Cluster-1445.3396|Cluster-1445.6793|Cluster-1445.10522|Cluster-1445.26438|Cluster-1445.21392|Cluster-1445.27693|Cluster-1445.881|Cluster-11139.0|Cluster-1445.6812|Cluster-1445.17289…
KEGG	ko04650	Natural killer cell mediated cytotoxicity	24|1559	98|5842	0.627801	0.999923	24	Cluster-1445.7991|Cluster-1445.8040|Cluster-1445.10223|Cluster-1445.12257|Cluster-1445.12074|Cluster-1445.13460|Cluster-1445.29033|Cluster-1445.14266|Cluster-1445.12942|Cluster-1445.2421|Cluster-1445.7769|Cluster-1445.18208|Cluster-1445.15596|Cluster-1445.16089|Cluster-1445.5502|Cluster-1445.17156|Cluster-1445.8382|Cluster-1445.14064|Cluster-1445.7435|Cluster-1445.4509|Cluster-1445.199|Cluster-14…
KEGG	ko00230	Purine metabolism	42|1559	170|5842	0.628805	0.999923	42	Cluster-2170.0|Cluster-1445.20646|Cluster-4560.0|Cluster-1445.8312|Cluster-1445.9503|Cluster-1445.12400|Cluster-1445.14338|Cluster-7380.0|Cluster-1445.8046|Cluster-1445.8047|Cluster-1445.27268|Cluster-1445.15655|Cluster-1445.14963|Cluster-1445.15003|Cluster-1445.5992|Cluster-1445.12730|Cluster-1445.19993|Cluster-1445.6364|Cluster-1445.26438|Cluster-1445.15086|Cluster-1445.22222|Cluster-1445.19266…
KEGG	ko04146	Peroxisome	20|1559	82|5842	0.629553	0.999923	20	Cluster-1445.14622|Cluster-1445.17006|Cluster-1445.21069|Cluster-1445.27719|Cluster-1445.18941|Cluster-1445.13519|Cluster-1445.17842|Cluster-1445.7084|Cluster-1445.21021|Cluster-1445.17544|Cluster-1445.16755|Cluster-1445.13123|Cluster-1445.17486|Cluster-1445.18784|Cluster-1445.17638|Cluster-1445.16485|Cluster-1445.24432|Cluster-1445.15507|Cluster-1445.19940|Cluster-1445.7822
KEGG	ko00010	Glycolysis / Gluconeogenesis	14|1559	58|5842	0.635921	0.999923	14	Cluster-1445.18592|Cluster-1445.17852|Cluster-1445.18409|Cluster-1445.17899|Cluster-1445.24306|Cluster-1445.25545|Cluster-1445.15854|Cluster-1445.16253|Cluster-1445.19914|Cluster-1445.3297|Cluster-1445.14970|Cluster-1445.16564|Cluster-1445.19420|Cluster-1445.28081
KEGG	ko00534	Glycosaminoglycan biosynthesis - heparan sulfate / heparin	5|1559	21|5842	0.641698	0.999923	5	Cluster-1445.22175|Cluster-1445.6023|Cluster-1445.23817|Cluster-1445.20488|Cluster-1445.21166
KEGG	ko00770	Pantothenate and CoA biosynthesis	5|1559	21|5842	0.641698	0.999923	5	Cluster-1445.9182|Cluster-1445.27268|Cluster-1445.10704|Cluster-1445.19825|Cluster-1445.16953
KEGG	ko05414	Dilated cardiomyopathy	25|1559	103|5842	0.644267	0.999923	25	Cluster-1445.22971|Cluster-1445.13494|Cluster-1445.13711|Cluster-1445.29499|Cluster-1445.15814|Cluster-1445.29033|Cluster-1445.28256|Cluster-1445.6094|Cluster-1445.6793|Cluster-1445.26438|Cluster-1445.21771|Cluster-1445.21897|Cluster-1445.16556|Cluster-11139.0|Cluster-1445.10527|Cluster-1445.9450|Cluster-1445.7460|Cluster-1445.6605|Cluster-1445.22920|Cluster-1445.16823|Cluster-1445.10166|Cluster-…
KEGG	ko00051	Fructose and mannose metabolism	10|1559	42|5842	0.645524	0.999923	10	Cluster-1445.22885|Cluster-1445.21617|Cluster-1445.1619|Cluster-1445.23475|Cluster-1445.6474|Cluster-1445.14905|Cluster-1445.24306|Cluster-1445.3048|Cluster-1445.17023|Cluster-1445.26077
KEGG	ko04723	Retrograde endocannabinoid signaling	21|1559	87|5842	0.647112	0.999923	21	Cluster-1445.4138|Cluster-1445.6605|Cluster-1445.12839|Cluster-1445.333|Cluster-11139.0|Cluster-1445.10509|Cluster-1445.27313|Cluster-1445.25912|Cluster-1445.332|Cluster-1445.28256|Cluster-1445.17160|Cluster-1445.29844|Cluster-1445.8225|Cluster-1445.3396|Cluster-1445.12257|Cluster-1445.4040|Cluster-1445.26438|Cluster-1445.24424|Cluster-1445.14079|Cluster-1445.30135|Cluster-1445.23341
KEGG	ko00650	Butanoate metabolism	4|1559	17|5842	0.651868	0.999923	4	Cluster-1445.15886|Cluster-1445.17153|Cluster-1445.18481|Cluster-1445.8849
KEGG	ko04068	FoxO signaling pathway	31|1559	128|5842	0.656975	0.999923	31	Cluster-1445.16168|Cluster-1445.21676|Cluster-1445.2664|Cluster-1445.14902|Cluster-1445.10305|Cluster-1445.18659|Cluster-1445.14266|Cluster-1445.14880|Cluster-1445.5148|Cluster-1445.26001|Cluster-1445.4537|Cluster-1445.971|Cluster-1445.23052|Cluster-1445.18208|Cluster-1445.16476|Cluster-1445.11148|Cluster-1445.20833|Cluster-1445.5502|Cluster-1445.22372|Cluster-1445.7988|Cluster-1445.10008|Cluster…
KEGG	ko04924	Renin secretion	14|1559	59|5842	0.657665	0.999923	14	Cluster-1445.6605|Cluster-1445.18673|Cluster-1445.13691|Cluster-1445.9359|Cluster-1445.12320|Cluster-1445.28256|Cluster-1445.17160|Cluster-1247.0|Cluster-1445.4040|Cluster-1445.17722|Cluster-1445.15086|Cluster-1445.2902|Cluster-1445.24636|Cluster-1445.18128
KEGG	ko04961	Endocrine and other factor-regulated calcium reabsorption	11|1559	47|5842	0.666553	0.999923	11	Cluster-1445.3520|Cluster-1445.6368|Cluster-1445.16824|Cluster-1445.11691|Cluster-1445.6369|Cluster-1445.20976|Cluster-1445.8393|Cluster-1445.12257|Cluster-1445.18046|Cluster-1445.19884|Cluster-1445.7938
KEGG	ko00720	Carbon fixation pathways in prokaryotes	3|1559	13|5842	0.667211	0.999923	3	Cluster-1445.18592|Cluster-1445.24316|Cluster-1445.19002
KEGG	ko04540	Gap junction	18|1559	76|5842	0.669388	0.999923	18	Cluster-1445.9948|Cluster-1445.9167|Cluster-1445.18673|Cluster-1445.4445|Cluster-11139.0|Cluster-1445.17128|Cluster-1445.13464|Cluster-1445.17160|Cluster-1445.5502|Cluster-1445.18619|Cluster-1445.18659|Cluster-1445.4040|Cluster-1445.5853|Cluster-1445.26438|Cluster-1445.12257|Cluster-1445.16023|Cluster-1445.4206|Cluster-1445.15378
KEGG	ko05144	Malaria	10|1559	43|5842	0.670601	0.999923	10	Cluster-1445.7435|Cluster-1445.16195|Cluster-1445.19916|Cluster-1445.12365|Cluster-1445.2003|Cluster-1445.14947|Cluster-1445.8352|Cluster-1445.547|Cluster-1445.12380|Cluster-1445.18845
KEGG	ko04725	Cholinergic synapse	21|1559	89|5842	0.682001	0.999923	21	Cluster-1445.12833|Cluster-1445.6605|Cluster-1445.25194|Cluster-1445.332|Cluster-1445.333|Cluster-11139.0|Cluster-1445.10509|Cluster-1445.7752|Cluster-1445.28256|Cluster-1445.12839|Cluster-1445.14266|Cluster-1445.29844|Cluster-1445.8225|Cluster-1445.10450|Cluster-1445.12257|Cluster-1445.17160|Cluster-1445.4040|Cluster-1445.26438|Cluster-1445.24424|Cluster-1445.26719|Cluster-1445.4138
KEGG	ko04917	Prolactin signaling pathway	12|1559	52|5842	0.685496	0.999923	12	Cluster-8953.0|Cluster-1445.14902|Cluster-1445.20976|Cluster-1445.14266|Cluster-1445.5502|Cluster-1445.3396|Cluster-1445.10303|Cluster-1445.10068|Cluster-1445.7769|Cluster-1445.12191|Cluster-1445.15378|Cluster-1445.9312
KEGG	ko01521	EGFR tyrosine kinase inhibitor resistance	19|1559	81|5842	0.685624	0.999923	19	Cluster-1445.20252|Cluster-1445.14815|Cluster-1445.12257|Cluster-1445.24007|Cluster-1445.3951|Cluster-1445.13190|Cluster-1445.3089|Cluster-1445.14266|Cluster-1445.15378|Cluster-1445.5502|Cluster-1445.7018|Cluster-1445.2225|Cluster-1445.18659|Cluster-1445.25276|Cluster-1445.18619|Cluster-1445.7769|Cluster-1445.15093|Cluster-1445.20161|Cluster-1445.9167
KEGG	ko04215	Apoptosis - multiple species	6|1559	27|5842	0.697391	0.999923	6	Cluster-1445.18194|Cluster-1445.24986|Cluster-1445.16220|Cluster-1445.14101|Cluster-1445.17156|Cluster-1445.15093
KEGG	ko00592	alpha-Linolenic acid metabolism	6|1559	27|5842	0.697391	0.999923	6	Cluster-1445.13029|Cluster-1445.21069|Cluster-1445.23811|Cluster-1445.29891|Cluster-1445.24432|Cluster-1445.13371
KEGG	ko04212	Longevity regulating pathway - worm	14|1559	61|5842	0.69896	0.999923	14	Cluster-1445.13463|Cluster-1445.16168|Cluster-1445.27448|Cluster-1445.16034|Cluster-1445.3951|Cluster-1445.8326|Cluster-1445.20090|Cluster-1445.18021|Cluster-1445.11139|Cluster-1445.3396|Cluster-1445.21497|Cluster-1445.24740|Cluster-1445.20583|Cluster-1445.22987
KEGG	ko04742	Taste transduction	9|1559	40|5842	0.700387	0.999923	9	Cluster-1445.4138|Cluster-1445.2560|Cluster-1445.23341|Cluster-1445.77|Cluster-1445.29844|Cluster-1445.17302|Cluster-1445.15086|Cluster-1445.20241|Cluster-1445.13501
KEGG	ko04740	Olfactory transduction	9|1559	40|5842	0.700387	0.999923	9	Cluster-1445.2218|Cluster-1445.333|Cluster-1445.332|Cluster-1445.25510|Cluster-1445.13464|Cluster-1445.18410|Cluster-1445.14898|Cluster-1445.26438|Cluster-1445.15086
KEGG	ko04914	Progesterone-mediated oocyte maturation	18|1559	78|5842	0.705495	0.999923	18	Cluster-1445.5148|Cluster-1445.19677|Cluster-1445.18172|Cluster-11139.0|Cluster-1445.12727|Cluster-1445.19967|Cluster-1445.7896|Cluster-1445.14266|Cluster-1445.6961|Cluster-5261.0|Cluster-1445.3396|Cluster-1445.7988|Cluster-1445.17160|Cluster-1445.5853|Cluster-1445.26438|Cluster-1445.22372|Cluster-1445.16154|Cluster-1445.13538
KEGG	ko04623	Cytosolic DNA-sensing pathway	8|1559	36|5842	0.707282	0.999923	8	Cluster-1445.15003|Cluster-1445.23510|Cluster-1445.19993|Cluster-1445.5595|Cluster-1445.9503|Cluster-1445.11114|Cluster-1445.8176|Cluster-1445.5201
KEGG	ko05030	Cocaine addiction	11|1559	49|5842	0.711854	0.999923	11	Cluster-1445.7377|Cluster-1445.26956|Cluster-1445.25095|Cluster-8977.0|Cluster-1445.17160|Cluster-1445.2519|Cluster-1445.10450|Cluster-1445.12954|Cluster-1445.23897|Cluster-1445.16018|Cluster-8475.0
KEGG	ko05169	Epstein-Barr virus infection	43|1559	181|5842	0.714734	0.999923	43	Cluster-1445.13321|Cluster-1445.7991|Cluster-1445.14589|Cluster-1445.24743|Cluster-1445.17890|Cluster-1445.26360|Cluster-1445.15003|Cluster-1445.26457|Cluster-1445.29033|Cluster-1445.19993|Cluster-1445.4537|Cluster-1445.18112|Cluster-1445.14266|Cluster-1445.3396|Cluster-1445.20256|Cluster-1445.11114|Cluster-1445.16089|Cluster-1445.20313|Cluster-1445.11077|Cluster-1445.7722|Cluster-1445.547|Cluste…
KEGG	ko05160	Hepatitis C	25|1559	108|5842	0.721986	0.999923	25	Cluster-1445.23119|Cluster-1445.9799|Cluster-1445.12722|Cluster-1445.14096|Cluster-1445.18659|Cluster-1445.12074|Cluster-1445.16831|Cluster-1445.12845|Cluster-4709.0|Cluster-1445.14266|Cluster-1445.3396|Cluster-1445.20256|Cluster-1445.11114|Cluster-1445.18985|Cluster-1445.10512|Cluster-1445.14815|Cluster-1445.24531|Cluster-1445.5502|Cluster-1445.8176|Cluster-1445.25637|Cluster-1445.13110|Cluster-…
KEGG	ko04923	Regulation of lipolysis in adipocytes	13|1559	58|5842	0.7227	0.999923	13	Cluster-1445.1083|Cluster-1445.16168|Cluster-1445.13029|Cluster-1445.13464|Cluster-1445.21711|Cluster-11139.0|Cluster-1445.17160|Cluster-1445.13355|Cluster-1445.10305|Cluster-1445.14266|Cluster-1445.26438|Cluster-1445.10003|Cluster-1445.16797
KEGG	ko04062	Chemokine signaling pathway	33|1559	141|5842	0.723671	0.999923	33	Cluster-1445.12278|Cluster-1445.14395|Cluster-1445.10509|Cluster-1445.17160|Cluster-1445.10223|Cluster-1445.8237|Cluster-6240.0|Cluster-1445.7338|Cluster-1445.26360|Cluster-1445.332|Cluster-1445.14266|Cluster-1445.27456|Cluster-1445.26557|Cluster-1445.30696|Cluster-1445.29501|Cluster-1445.26438|Cluster-1445.7769|Cluster-1445.11923|Cluster-1445.333|Cluster-11139.0|Cluster-9716.0|Cluster-1445.6812|…
KEGG	ko00360	Phenylalanine metabolism	4|1559	19|5842	0.724451	0.999923	4	Cluster-1445.21756|Cluster-1445.16018|Cluster-1445.17476|Cluster-1445.19703
KEGG	ko00220	Arginine biosynthesis	4|1559	19|5842	0.724451	0.999923	4	Cluster-1445.6427|Cluster-1445.17926|Cluster-5243.0|Cluster-1445.11079
KEGG	ko04360	Axon guidance	41|1559	174|5842	0.727618	0.999923	41	Cluster-1445.6297|Cluster-1445.17838|Cluster-1445.9299|Cluster-1445.21444|Cluster-1445.19629|Cluster-1445.19063|Cluster-1445.9273|Cluster-1445.13162|Cluster-1445.20826|Cluster-1445.17160|Cluster-1445.25581|Cluster-1445.19146|Cluster-1445.10223|Cluster-1445.8237|Cluster-1445.19772|Cluster-1445.17126|Cluster-1445.21588|Cluster-1445.19998|Cluster-8101.1|Cluster-8101.0|Cluster-1445.14266|Cluster-1445…
KEGG	ko04960	Aldosterone-regulated sodium reabsorption	8|1559	37|5842	0.731878	0.999923	8	Cluster-1445.16168|Cluster-1445.6369|Cluster-1445.6368|Cluster-1445.11148|Cluster-1445.14266|Cluster-1445.8393|Cluster-1445.12257|Cluster-1445.18046
KEGG	ko02020	Two-component system	2|1559	10|5842	0.739714	0.999923	2	Cluster-1445.26844|Cluster-1445.24860
KEGG	ko04950	Maturity onset diabetes of the young	2|1559	10|5842	0.739714	0.999923	2	Cluster-1445.1717|Cluster-1445.15988
KEGG	ko04728	Dopaminergic synapse	27|1559	118|5842	0.745885	0.999923	27	Cluster-1445.10509|Cluster-1445.14898|Cluster-1445.17160|Cluster-1445.14079|Cluster-1445.10450|Cluster-1445.25912|Cluster-1445.23888|Cluster-1445.23887|Cluster-1445.11797|Cluster-1445.28256|Cluster-1445.16018|Cluster-1445.3396|Cluster-1445.4040|Cluster-1445.24424|Cluster-1445.4138|Cluster-1445.333|Cluster-1445.332|Cluster-8977.0|Cluster-1445.8225|Cluster-1445.8019|Cluster-1445.9387|Cluster-1445.2…
KEGG	ko00960	Tropane, piperidine and pyridine alkaloid biosynthesis	1|1559	5|5842	0.747996	0.999923	1	Cluster-1445.19703
KEGG	ko00254	Aflatoxin biosynthesis	1|1559	5|5842	0.747996	0.999923	1	Cluster-1445.16664
KEGG	ko01230	Biosynthesis of amino acids	15|1559	68|5842	0.750428	0.999923	15	Cluster-1445.15464|Cluster-1445.16370|Cluster-1445.15731|Cluster-1445.3297|Cluster-1445.17926|Cluster-1445.13435|Cluster-1445.24306|Cluster-1445.25545|Cluster-1445.16253|Cluster-1445.19914|Cluster-1445.11079|Cluster-1445.19825|Cluster-1445.12258|Cluster-1445.14732|Cluster-5243.0
KEGG	ko00710	Carbon fixation in photosynthetic organisms	4|1559	20|5842	0.756242	0.999923	4	Cluster-1445.25992|Cluster-1445.5162|Cluster-1445.17926|Cluster-1445.14958
KEGG	ko04620	Toll-like receptor signaling pathway	17|1559	77|5842	0.758729	0.999923	17	Cluster-1445.18194|Cluster-1445.22987|Cluster-1445.8255|Cluster-1445.16831|Cluster-1445.26449|Cluster-1445.15701|Cluster-1445.13986|Cluster-1445.23510|Cluster-1445.3185|Cluster-1445.12365|Cluster-1445.3396|Cluster-1445.14266|Cluster-1445.8176|Cluster-1445.8230|Cluster-1445.12074|Cluster-1445.25637|Cluster-1445.17890
KEGG	ko04911	Insulin secretion	16|1559	73|5842	0.762748	0.999923	16	Cluster-1445.6605|Cluster-1445.6369|Cluster-1445.6368|Cluster-11139.0|Cluster-1445.3682|Cluster-1445.9359|Cluster-1445.14393|Cluster-1445.28256|Cluster-1445.13663|Cluster-1445.22825|Cluster-1445.8393|Cluster-1445.12257|Cluster-1445.18046|Cluster-1445.26438|Cluster-1445.10450|Cluster-1445.24636
KEGG	ko04020	Calcium signaling pathway	39|1559	169|5842	0.762851	0.999923	39	Cluster-1445.1858|Cluster-1445.12320|Cluster-1445.3520|Cluster-1445.18824|Cluster-1445.1902|Cluster-1445.18659|Cluster-1445.24950|Cluster-1445.10003|Cluster-1445.29033|Cluster-1445.16280|Cluster-1445.25510|Cluster-1445.28256|Cluster-1445.4040|Cluster-1445.26438|Cluster-1445.15086|Cluster-1445.15743|Cluster-1445.21392|Cluster-1445.4138|Cluster-1445.25194|Cluster-11139.0|Cluster-1445.24733|Cluster-…
KEGG	ko00680	Methane metabolism	5|1559	25|5842	0.766812	0.999923	5	Cluster-1445.25545|Cluster-1445.18592|Cluster-1445.16253|Cluster-1445.24306|Cluster-1445.3297
KEGG	ko04320	Dorso-ventral axis formation	5|1559	25|5842	0.766812	0.999923	5	Cluster-1445.5502|Cluster-1445.19677|Cluster-1445.18659|Cluster-2159.0|Cluster-1445.23874
KEGG	ko04010	MAPK signaling pathway	52|1559	223|5842	0.769503	0.999923	52	Cluster-1445.22971|Cluster-1445.20826|Cluster-1445.7896|Cluster-10573.0|Cluster-1445.8040|Cluster-1445.13538|Cluster-1445.10223|Cluster-1445.18659|Cluster-1445.12362|Cluster-1445.16769|Cluster-1445.13204|Cluster-1445.19493|Cluster-1445.17890|Cluster-1445.11923|Cluster-1445.27591|Cluster-1445.7420|Cluster-1445.12493|Cluster-1445.20689|Cluster-1445.28256|Cluster-1445.971|Cluster-1445.27984|Cluster-…
KEGG	ko04260	Cardiac muscle contraction	14|1559	65|5842	0.772017	0.999923	14	Cluster-1445.6605|Cluster-1445.6369|Cluster-1445.8393|Cluster-1445.18617|Cluster-1445.16556|Cluster-1445.22971|Cluster-1445.13494|Cluster-1445.5063|Cluster-1445.28256|Cluster-1445.16291|Cluster-1445.6368|Cluster-1445.18046|Cluster-1445.7460|Cluster-1445.26736
KEGG	ko02010	ABC transporters	11|1559	52|5842	0.772083	0.999923	11	Cluster-1445.20100|Cluster-1445.23937|Cluster-1445.2674|Cluster-3100.0|Cluster-1445.16366|Cluster-1445.17855|Cluster-1445.8430|Cluster-1445.14657|Cluster-1445.8518|Cluster-1445.16287|Cluster-1445.2404
KEGG	ko05217	Basal cell carcinoma	11|1559	52|5842	0.772083	0.999923	11	Cluster-1445.5222|Cluster-1445.2478|Cluster-1445.13499|Cluster-1445.4354|Cluster-1445.22350|Cluster-1445.22728|Cluster-1445.7985|Cluster-1445.17426|Cluster-1445.5015|Cluster-1445.19421|Cluster-1445.11071
KEGG	ko04919	Thyroid hormone signaling pathway	26|1559	116|5842	0.773793	0.999923	26	Cluster-1445.4537|Cluster-1445.10730|Cluster-1445.14101|Cluster-1445.12257|Cluster-1445.2179|Cluster-1445.5222|Cluster-1445.6369|Cluster-1445.6368|Cluster-1445.6474|Cluster-1445.14266|Cluster-1445.20541|Cluster-1445.20583|Cluster-1445.8897|Cluster-1445.22885|Cluster-1445.14815|Cluster-1445.20976|Cluster-1445.3048|Cluster-1445.22920|Cluster-1445.8393|Cluster-1445.3951|Cluster-1445.1067|Cluster-144…
KEGG	ko00564	Glycerophospholipid metabolism	17|1559	78|5842	0.774201	0.999923	17	Cluster-1445.14293|Cluster-1445.6380|Cluster-1445.18176|Cluster-1445.19322|Cluster-1445.14360|Cluster-1445.13029|Cluster-1445.7752|Cluster-1445.3026|Cluster-1445.13255|Cluster-1445.4549|Cluster-1445.18708|Cluster-1445.23811|Cluster-1445.24685|Cluster-1445.7120|Cluster-1445.15803|Cluster-1445.29147|Cluster-1445.29891
KEGG	ko05152	Tuberculosis	37|1559	162|5842	0.776212	0.999923	37	Cluster-1445.1858|Cluster-1445.18194|Cluster-1445.18829|Cluster-1445.8255|Cluster-1445.11552|Cluster-1445.12275|Cluster-1445.14101|Cluster-1445.12365|Cluster-1445.8352|Cluster-1445.14090|Cluster-1445.7078|Cluster-1445.29033|Cluster-1445.4537|Cluster-1445.24984|Cluster-1445.3396|Cluster-1445.11077|Cluster-1445.18303|Cluster-1445.8243|Cluster-1445.14815|Cluster-1445.21602|Cluster-1445.19317|Cluster…
KEGG	ko04918	Thyroid hormone synthesis	16|1559	74|5842	0.778458	0.999923	16	Cluster-1445.16230|Cluster-1445.13890|Cluster-1445.6368|Cluster-1445.4040|Cluster-11139.0|Cluster-1445.20794|Cluster-1445.6369|Cluster-1445.17404|Cluster-1445.9179|Cluster-1445.8393|Cluster-1445.12257|Cluster-1445.18046|Cluster-1445.26438|Cluster-1445.24864|Cluster-1445.10033|Cluster-1445.10450
KEGG	ko04722	Neurotrophin signaling pathway	24|1559	108|5842	0.778856	0.999923	24	Cluster-1445.12278|Cluster-1445.4283|Cluster-1445.7896|Cluster-1445.12362|Cluster-1445.19493|Cluster-1445.11390|Cluster-1445.7078|Cluster-1445.18182|Cluster-1445.14266|Cluster-1445.24038|Cluster-1445.3396|Cluster-1445.7769|Cluster-1445.11923|Cluster-1445.10910|Cluster-1445.14815|Cluster-1445.12667|Cluster-1445.5502|Cluster-1445.14950|Cluster-1445.1954|Cluster-1445.29634|Cluster-1445.7377|Cluster-…
KEGG	ko00950	Isoquinoline alkaloid biosynthesis	2|1559	11|5842	0.780124	0.999923	2	Cluster-1445.16018|Cluster-1445.19703
KEGG	ko04750	Inflammatory mediator regulation of TRP channels	21|1559	96|5842	0.787799	0.999923	21	Cluster-1445.16385|Cluster-1445.12278|Cluster-1445.27448|Cluster-1445.27063|Cluster-11139.0|Cluster-1445.12354|Cluster-1445.13463|Cluster-1445.3520|Cluster-1445.14266|Cluster-1445.15378|Cluster-1445.2902|Cluster-1445.3396|Cluster-1445.12257|Cluster-1445.4040|Cluster-1445.11268|Cluster-1445.26438|Cluster-1445.19216|Cluster-1445.24801|Cluster-1445.22987|Cluster-1445.16097|Cluster-1445.17890
KEGG	ko04964	Proximal tubule bicarbonate reclamation	5|1559	26|5842	0.792259	0.999923	5	Cluster-1445.13691|Cluster-1445.6369|Cluster-1445.8393|Cluster-1445.6368|Cluster-1445.18046
KEGG	ko04111	Cell cycle - yeast	16|1559	75|5842	0.793439	0.999923	16	Cluster-1445.6819|Cluster-1445.6961|Cluster-1445.24963|Cluster-1445.11255|Cluster-1445.19967|Cluster-1445.27598|Cluster-1445.27599|Cluster-1445.19453|Cluster-1445.16154|Cluster-1445.4130|Cluster-5261.0|Cluster-1445.6229|Cluster-1445.11282|Cluster-1445.10174|Cluster-1445.20141|Cluster-1445.25773
KEGG	ko05203	Viral carcinogenesis	38|1559	168|5842	0.795102	0.999923	38	Cluster-5382.0|Cluster-1445.17259|Cluster-1445.14902|Cluster-1445.11476|Cluster-1445.7991|Cluster-1445.9935|Cluster-1445.10450|Cluster-1445.14589|Cluster-1445.1067|Cluster-1445.26360|Cluster-1445.26457|Cluster-1445.4537|Cluster-1445.14266|Cluster-1445.11371|Cluster-1445.1255|Cluster-1445.29501|Cluster-1445.16089|Cluster-1445.16995|Cluster-1445.7722|Cluster-1445.14815|Cluster-1445.21602|Cluster-14…
KEGG	ko05223	Non-small cell lung cancer	10|1559	49|5842	0.797572	0.999923	10	Cluster-1445.14101|Cluster-1445.14815|Cluster-1445.13190|Cluster-1445.24139|Cluster-1445.14266|Cluster-1445.5502|Cluster-1445.24457|Cluster-1445.12257|Cluster-1445.9451|Cluster-1445.18659
KEGG	ko05212	Pancreatic cancer	12|1559	58|5842	0.80006	0.999923	12	Cluster-1445.16476|Cluster-1445.14815|Cluster-1445.13190|Cluster-1445.15252|Cluster-1445.24457|Cluster-1445.14266|Cluster-1445.14101|Cluster-1445.20252|Cluster-1445.8482|Cluster-1445.10223|Cluster-1445.18659|Cluster-1445.9451
KEGG	ko03440	Homologous recombination	7|1559	36|5842	0.808	0.999923	7	Cluster-1445.13897|Cluster-7981.0|Cluster-1445.24897|Cluster-1445.11843|Cluster-1445.8482|Cluster-1445.22271|Cluster-1445.25452
KEGG	ko01210	2-Oxocarboxylic acid metabolism	3|1559	17|5842	0.809682	0.999923	3	Cluster-1445.17926|Cluster-1445.19825|Cluster-1445.15464
KEGG	ko04140	Regulation of autophagy	4|1559	22|5842	0.811193	0.999923	4	Cluster-1445.21418|Cluster-1445.22268|Cluster-1445.23052|Cluster-1445.10724
KEGG	ko03020	RNA polymerase	4|1559	22|5842	0.811193	0.999923	4	Cluster-1445.5201|Cluster-1445.19993|Cluster-1445.15003|Cluster-1445.9503
KEGG	ko04152	AMPK signaling pathway	29|1559	132|5842	0.812451	0.999923	29	Cluster-1445.16168|Cluster-1445.21617|Cluster-1445.21676|Cluster-1445.23543|Cluster-1445.10305|Cluster-1445.10450|Cluster-1445.19908|Cluster-1445.6474|Cluster-1445.14266|Cluster-1445.14411|Cluster-1445.23052|Cluster-1445.16664|Cluster-1445.22885|Cluster-1445.8326|Cluster-1445.23475|Cluster-1445.24306|Cluster-1445.3048|Cluster-1445.21497|Cluster-1445.12631|Cluster-1445.7401|Cluster-1445.10034|Clus…
KEGG	ko04214	Apoptosis - fly	10|1559	50|5842	0.814716	0.999923	10	Cluster-1445.16220|Cluster-1445.18182|Cluster-1445.18251|Cluster-1445.20953|Cluster-1445.13986|Cluster-1445.11139|Cluster-1445.18659|Cluster-1445.24740|Cluster-1445.10962|Cluster-1445.19493
KEGG	ko00250	Alanine, aspartate and glutamate metabolism	5|1559	27|5842	0.815477	0.999923	5	Cluster-1445.19744|Cluster-1445.17464|Cluster-1445.17926|Cluster-1445.20939|Cluster-1445.12985
KEGG	ko03410	Base excision repair	8|1559	41|5842	0.815826	0.999923	8	Cluster-2096.1|Cluster-1445.5992|Cluster-1445.22271|Cluster-1445.7311|Cluster-1445.11139|Cluster-1445.21784|Cluster-1445.24740|Cluster-1445.25452
KEGG	ko04971	Gastric acid secretion	14|1559	68|5842	0.818134	0.999923	14	Cluster-1445.6369|Cluster-1445.6368|Cluster-11139.0|Cluster-1445.17874|Cluster-1445.11846|Cluster-1445.17160|Cluster-1445.26438|Cluster-1445.2236|Cluster-1445.12257|Cluster-1445.18824|Cluster-1445.4181|Cluster-1445.4040|Cluster-1445.26719|Cluster-1445.21392
KEGG	ko05034	Alcoholism	19|1559	90|5842	0.820597	0.999923	19	Cluster-1445.1083|Cluster-1445.7377|Cluster-1445.333|Cluster-1445.332|Cluster-1445.10509|Cluster-8977.0|Cluster-1445.23543|Cluster-1445.17160|Cluster-1445.2519|Cluster-1445.5502|Cluster-1445.8225|Cluster-1445.1255|Cluster-1445.12954|Cluster-1445.24424|Cluster-1445.16249|Cluster-1445.10450|Cluster-1445.7769|Cluster-1445.16018|Cluster-8475.0
KEGG	ko04012	ErbB signaling pathway	16|1559	77|5842	0.821224	0.999923	16	Cluster-1445.6297|Cluster-1445.14815|Cluster-1445.26468|Cluster-1445.3089|Cluster-1445.72|Cluster-1445.3951|Cluster-1445.13190|Cluster-1445.14266|Cluster-1445.5502|Cluster-1445.12257|Cluster-1445.18659|Cluster-1445.14950|Cluster-1445.7769|Cluster-1445.11923|Cluster-1445.15378|Cluster-1445.25339
KEGG	ko05210	Colorectal cancer	13|1559	64|5842	0.824076	0.999923	13	Cluster-1445.16476|Cluster-1445.14815|Cluster-1445.2478|Cluster-1445.13499|Cluster-1445.4354|Cluster-1445.14266|Cluster-1445.14101|Cluster-1445.9900|Cluster-1445.10223|Cluster-1445.7985|Cluster-1445.15192|Cluster-1445.17426|Cluster-1445.5015
KEGG	ko04072	Phospholipase D signaling pathway	28|1559	129|5842	0.82522	0.999923	28	Cluster-1445.16168|Cluster-1445.19322|Cluster-1445.20023|Cluster-1445.12320|Cluster-1445.20397|Cluster-1445.12257|Cluster-1445.18619|Cluster-1445.14360|Cluster-1445.29033|Cluster-1445.14266|Cluster-1445.20149|Cluster-1445.26438|Cluster-1445.17754|Cluster-1445.20826|Cluster-1445.25095|Cluster-11139.0|Cluster-1445.5502|Cluster-1445.18461|Cluster-1445.7769|Cluster-1445.4473|Cluster-1445.9167|Cluster…
KEGG	ko04921	Oxytocin signaling pathway	31|1559	142|5842	0.82784	0.999923	31	Cluster-1445.13630|Cluster-1445.21676|Cluster-1445.22971|Cluster-1445.23543|Cluster-1445.18824|Cluster-1445.8040|Cluster-1445.6195|Cluster-1445.12257|Cluster-1445.28256|Cluster-1445.14266|Cluster-1445.20541|Cluster-1445.23052|Cluster-8410.0|Cluster-1445.4040|Cluster-1445.26438|Cluster-1445.18659|Cluster-1445.21392|Cluster-11139.0|Cluster-1445.20970|Cluster-1445.17160|Cluster-1445.1902|Cluster-144…
KEGG	ko04350	TGF-beta signaling pathway	14|1559	69|5842	0.831871	0.999923	14	Cluster-1445.16476|Cluster-1445.22994|Cluster-1445.16195|Cluster-1445.17102|Cluster-1445.9323|Cluster-1445.16212|Cluster-1445.4537|Cluster-1445.771|Cluster-1445.1067|Cluster-1445.21439|Cluster-1445.7765|Cluster-7824.0|Cluster-1445.14518|Cluster-1445.11727
KEGG	ko04922	Glucagon signaling pathway	21|1559	100|5842	0.836096	0.999923	21	Cluster-1445.19944|Cluster-1445.21676|Cluster-1445.1965|Cluster-1445.4537|Cluster-1445.1067|Cluster-1445.19420|Cluster-1445.3811|Cluster-1445.21648|Cluster-1445.23052|Cluster-1445.16253|Cluster-1445.1904|Cluster-1445.16664|Cluster-1445.3297|Cluster-1445.12631|Cluster-1445.4040|Cluster-1445.19030|Cluster-10932.0|Cluster-1445.10450|Cluster-1445.10034|Cluster-1445.28081|Cluster-1445.19914
KEGG	ko04139	Regulation of mitophagy - yeast	5|1559	28|5842	0.836563	0.999923	5	Cluster-1445.10962|Cluster-1445.20409|Cluster-1445.3396|Cluster-1445.12257|Cluster-1445.3951
KEGG	ko05031	Amphetamine addiction	11|1559	56|5842	0.837758	0.999923	11	Cluster-1445.6605|Cluster-1445.12954|Cluster-8977.0|Cluster-1445.28256|Cluster-1445.16018|Cluster-1445.14079|Cluster-1445.10450|Cluster-1445.12257|Cluster-1445.25912|Cluster-1445.2519|Cluster-8475.0
KEGG	ko00565	Ether lipid metabolism	7|1559	38|5842	0.844587	0.999923	7	Cluster-1445.13029|Cluster-1445.23811|Cluster-1445.17733|Cluster-1445.7120|Cluster-1445.15803|Cluster-1445.13255|Cluster-1445.29891
KEGG	ko03450	Non-homologous end-joining	2|1559	13|5842	0.844692	0.999923	2	Cluster-1445.24897|Cluster-1445.17054
KEGG	ko05205	Proteoglycans in cancer	48|1559	216|5842	0.848013	0.999923	48	Cluster-1445.13326|Cluster-1445.20826|Cluster-1445.13321|Cluster-1445.6195|Cluster-1445.12365|Cluster-1445.18659|Cluster-1445.4181|Cluster-1445.12380|Cluster-1445.5222|Cluster-1445.29501|Cluster-1445.24966|Cluster-1445.22920|Cluster-1445.26468|Cluster-1445.18112|Cluster-1445.14266|Cluster-1445.20252|Cluster-1445.3396|Cluster-8410.0|Cluster-1445.6793|Cluster-1445.4040|Cluster-1445.22728|Cluster-14…
KEGG	ko05132	Salmonella infection	17|1559	84|5842	0.85273	0.999923	17	Cluster-1445.1861|Cluster-1445.24406|Cluster-1445.3438|Cluster-1445.9422|Cluster-1445.26449|Cluster-1445.21713|Cluster-1445.13849|Cluster-1445.23112|Cluster-1445.17344|Cluster-1445.3518|Cluster-1445.16987|Cluster-1445.3396|Cluster-1445.5747|Cluster-1445.14559|Cluster-1445.19559|Cluster-1445.6895|Cluster-1445.16450
KEGG	ko00640	Propanoate metabolism	5|1559	29|5842	0.855632	0.999923	5	Cluster-1445.18592|Cluster-1445.18008|Cluster-1445.17341|Cluster-1445.25071|Cluster-1445.16664
KEGG	ko04341	Hedgehog signaling pathway - fly	5|1559	29|5842	0.855632	0.999923	5	Cluster-1445.22350|Cluster-1445.19830|Cluster-1445.13443|Cluster-1445.30696|Cluster-1445.11071
KEGG	ko05133	Pertussis	12|1559	62|5842	0.857447	0.999923	12	Cluster-1445.18744|Cluster-1445.8255|Cluster-1445.26449|Cluster-1445.21602|Cluster-1445.17160|Cluster-6240.0|Cluster-1445.24456|Cluster-1445.3396|Cluster-1445.18049|Cluster-1445.19437|Cluster-1445.25637|Cluster-1445.8858
KEGG	ko04915	Estrogen signaling pathway	18|1559	89|5842	0.858949	0.999923	18	Cluster-1445.12278|Cluster-1445.12839|Cluster-1445.19070|Cluster-1445.18172|Cluster-11139.0|Cluster-1445.20976|Cluster-1445.14266|Cluster-1445.5502|Cluster-1445.24966|Cluster-1445.18659|Cluster-1445.17160|Cluster-1445.4040|Cluster-1445.26438|Cluster-1445.7769|Cluster-1445.6427|Cluster-1445.10450|Cluster-1445.15378|Cluster-1445.20241
KEGG	ko04550	Signaling pathways regulating pluripotency of stem cells	26|1559	124|5842	0.859312	0.999923	26	Cluster-1445.13499|Cluster-1445.16212|Cluster-1445.13204|Cluster-1445.10991|Cluster-1445.21829|Cluster-1445.26360|Cluster-1445.5222|Cluster-1445.2478|Cluster-1445.14266|Cluster-1445.27984|Cluster-1445.3396|Cluster-1445.16995|Cluster-1445.14518|Cluster-1445.16476|Cluster-1445.4354|Cluster-1445.15843|Cluster-1445.7018|Cluster-1445.7985|Cluster-1445.26520|Cluster-1445.1895|Cluster-1445.9323|Cluster-…
KEGG	ko04071	Sphingolipid signaling pathway	21|1559	103|5842	0.866623	0.999923	21	Cluster-1445.1858|Cluster-1445.3520|Cluster-1445.19493|Cluster-1445.17833|Cluster-1445.19526|Cluster-1445.18182|Cluster-1445.3396|Cluster-1445.17389|Cluster-1445.22888|Cluster-1445.14266|Cluster-1445.17243|Cluster-1445.17156|Cluster-1445.17814|Cluster-1445.10223|Cluster-1445.12257|Cluster-1445.17160|Cluster-1445.17754|Cluster-1445.3066|Cluster-1445.6427|Cluster-1445.18461|Cluster-1445.13110
KEGG	ko04380	Osteoclast differentiation	21|1559	103|5842	0.866623	0.999923	21	Cluster-1445.4168|Cluster-1445.8243|Cluster-1445.22987|Cluster-1445.15701|Cluster-1445.13557|Cluster-1445.25513|Cluster-1445.28702|Cluster-1445.15442|Cluster-1445.13986|Cluster-1445.8040|Cluster-1445.3396|Cluster-1445.20256|Cluster-1445.14266|Cluster-1445.27063|Cluster-1445.14564|Cluster-1445.24436|Cluster-1445.12191|Cluster-1445.12074|Cluster-9716.0|Cluster-1445.9312|Cluster-1445.13110
KEGG	ko05215	Prostate cancer	18|1559	90|5842	0.86913	0.999923	18	Cluster-1445.14101|Cluster-1445.14815|Cluster-1445.14191|Cluster-1445.3951|Cluster-1445.18172|Cluster-1445.13190|Cluster-1445.4537|Cluster-1445.14266|Cluster-1445.5502|Cluster-1445.24457|Cluster-1445.18659|Cluster-1445.1067|Cluster-1445.18619|Cluster-1445.22372|Cluster-1445.3221|Cluster-1445.10450|Cluster-1445.9167|Cluster-1445.14481
KEGG	ko05131	Shigellosis	12|1559	63|5842	0.869563	0.999923	12	Cluster-1445.24406|Cluster-1445.23112|Cluster-1445.14559|Cluster-1445.7160|Cluster-1445.18112|Cluster-1445.13321|Cluster-1445.16450|Cluster-1445.3396|Cluster-1445.14950|Cluster-1445.16987|Cluster-1445.15378|Cluster-1445.11923
KEGG	ko05166	HTLV-I infection	57|1559	257|5842	0.869754	0.999923	57	Cluster-1445.18829|Cluster-1445.11094|Cluster-1445.20826|Cluster-1445.11476|Cluster-1445.7991|Cluster-1445.8040|Cluster-1445.14090|Cluster-1445.22271|Cluster-1445.26360|Cluster-1445.5222|Cluster-1445.2478|Cluster-1445.19317|Cluster-1445.5992|Cluster-1445.4537|Cluster-1445.14902|Cluster-1445.14266|Cluster-1445.6961|Cluster-1445.16154|Cluster-1445.16517|Cluster-1445.18203|Cluster-1445.16089|Cluster…
KEGG	ko04261	Adrenergic signaling in cardiomyocytes	28|1559	134|5842	0.870717	0.999923	28	Cluster-1445.11094|Cluster-1445.22971|Cluster-1445.13494|Cluster-1445.12320|Cluster-1445.17160|Cluster-1445.10450|Cluster-1445.12257|Cluster-1445.12362|Cluster-1445.24950|Cluster-1445.15743|Cluster-1445.6369|Cluster-1445.6368|Cluster-1445.16280|Cluster-1445.28256|Cluster-1445.14266|Cluster-1445.3396|Cluster-1445.26438|Cluster-1445.12917|Cluster-1445.16556|Cluster-11139.0|Cluster-1445.30723|Cluste…
KEGG	ko04626	Plant-pathogen interaction	1|1559	8|5842	0.873525	0.999923	1	Cluster-1445.18172
KEGG	ko03430	Mismatch repair	4|1559	25|5842	0.874202	0.999923	4	Cluster-1445.25452|Cluster-1445.9900|Cluster-1445.22271|Cluster-1445.15192
KEGG	ko00030	Pentose phosphate pathway	4|1559	25|5842	0.874202	0.999923	4	Cluster-1445.12403|Cluster-1445.17592|Cluster-1445.24306|Cluster-1445.18533
KEGG	ko05218	Melanoma	11|1559	59|5842	0.876647	0.999923	11	Cluster-1445.27591|Cluster-1445.14815|Cluster-1445.7420|Cluster-1445.14266|Cluster-1445.7018|Cluster-1445.24457|Cluster-1445.18659|Cluster-1445.9451|Cluster-1445.10599|Cluster-1445.18619|Cluster-1445.9167
KEGG	ko04330	Notch signaling pathway	9|1559	50|5842	0.881026	0.999923	9	Cluster-1445.76|Cluster-1445.21611|Cluster-1445.26457|Cluster-6124.0|Cluster-1445.4537|Cluster-1445.9296|Cluster-1445.1067|Cluster-1445.13697|Cluster-1445.17606
KEGG	ko04730	Long-term depression	10|1559	55|5842	0.884344	0.999923	10	Cluster-1445.4138|Cluster-1445.18673|Cluster-1445.13464|Cluster-1445.17160|Cluster-1445.29844|Cluster-1445.18461|Cluster-1445.12257|Cluster-1445.4040|Cluster-1445.17754|Cluster-1445.24435
KEGG	ko05120	Epithelial cell signaling in Helicobacter pylori infection	11|1559	60|5842	0.887803	0.999923	11	Cluster-1445.19337|Cluster-1445.19176|Cluster-1445.12275|Cluster-1445.17088|Cluster-1445.3396|Cluster-1445.18659|Cluster-8679.0|Cluster-1445.24435|Cluster-1445.18303|Cluster-1445.15378|Cluster-1445.28631
KEGG	ko04130	SNARE interactions in vesicular transport	5|1559	31|5842	0.888212	0.999923	5	Cluster-1445.18127|Cluster-1445.12769|Cluster-1445.21151|Cluster-1445.19860|Cluster-1445.14393
KEGG	ko05211	Renal cell carcinoma	12|1559	65|5842	0.891325	0.999923	12	Cluster-1445.6297|Cluster-1445.20252|Cluster-1445.18664|Cluster-1445.13190|Cluster-1445.20429|Cluster-1445.4537|Cluster-1445.14266|Cluster-1445.5502|Cluster-1445.1067|Cluster-1445.20583|Cluster-1445.10910|Cluster-1445.11923
KEGG	ko04144	Endocytosis	60|1559	274|5842	0.893813	0.999923	60	Cluster-1445.23112|Cluster-1445.20023|Cluster-1445.13326|Cluster-1445.16060|Cluster-1445.7991|Cluster-1445.1730|Cluster-1445.24832|Cluster-1445.18659|Cluster-1445.25607|Cluster-1445.13204|Cluster-1445.14145|Cluster-1445.18478|Cluster-1445.4739|Cluster-1445.18650|Cluster-1445.10076|Cluster-1445.4215|Cluster-1445.25513|Cluster-1445.3057|Cluster-1445.2458|Cluster-1445.27984|Cluster-1445.12194|Cluste…
KEGG	ko00532	Glycosaminoglycan biosynthesis - chondroitin sulfate / dermatan sulfate	3|1559	21|5842	0.896859	0.999923	3	Cluster-1445.22175|Cluster-1445.14691|Cluster-1445.19240
KEGG	ko05134	Legionellosis	7|1559	42|5842	0.900884	0.999923	7	Cluster-1445.21602|Cluster-1445.26449|Cluster-1445.20833|Cluster-1445.14101|Cluster-1445.12365|Cluster-1445.8352|Cluster-1445.21436
KEGG	ko05230	Central carbon metabolism in cancer	10|1559	57|5842	0.90542	0.999923	10	Cluster-1445.24306|Cluster-1445.19146|Cluster-1445.3951|Cluster-1445.14266|Cluster-1445.16253|Cluster-1445.18659|Cluster-1445.19914|Cluster-1445.3297|Cluster-1445.20583|Cluster-1445.29046
KEGG	ko04910	Insulin signaling pathway	26|1559	132|5842	0.917869	0.999923	26	Cluster-1445.16168|Cluster-1445.21676|Cluster-1445.13305|Cluster-6780.0|Cluster-1445.4656|Cluster-1445.3736|Cluster-1445.11923|Cluster-1445.21807|Cluster-1445.14266|Cluster-1445.24038|Cluster-1445.23052|Cluster-1445.9312|Cluster-1445.16664|Cluster-1445.7769|Cluster-10932.0|Cluster-1445.10910|Cluster-1445.14815|Cluster-1445.21081|Cluster-1445.5502|Cluster-1445.7401|Cluster-1445.1904|Cluster-1445.3…
KEGG	ko00520	Amino sugar and nucleotide sugar metabolism	7|1559	44|5842	0.921821	0.999923	7	Cluster-1445.1619|Cluster-1445.18025|Cluster-1445.21367|Cluster-1445.23221|Cluster-1445.14905|Cluster-1445.14557|Cluster-1445.21459
KEGG	ko00310	Lysine degradation	14|1559	78|5842	0.922495	0.999923	14	Cluster-1445.9797|Cluster-1445.28675|Cluster-1445.13705|Cluster-4627.0|Cluster-1445.18825|Cluster-1445.23528|Cluster-1445.25473|Cluster-1445.4696|Cluster-1445.19561|Cluster-1445.1812|Cluster-1445.17899|Cluster-1445.14970|Cluster-1445.5825|Cluster-1445.24973
KEGG	ko01200	Carbon metabolism	18|1559	97|5842	0.925175	0.999923	18	Cluster-1445.15464|Cluster-1445.25071|Cluster-1445.19357|Cluster-1445.18592|Cluster-1445.24316|Cluster-1445.12403|Cluster-1445.17926|Cluster-1445.13435|Cluster-1445.24306|Cluster-1445.18533|Cluster-1445.25545|Cluster-1445.5162|Cluster-1445.16867|Cluster-1445.16253|Cluster-1445.19914|Cluster-1445.3297|Cluster-1445.25992|Cluster-1445.24860
KEGG	ko03018	RNA degradation	12|1559	69|5842	0.925958	0.999923	12	Cluster-1445.25545|Cluster-1445.5703|Cluster-1445.13641|Cluster-1445.24306|Cluster-1445.13203|Cluster-1445.21809|Cluster-1445.14872|Cluster-1445.24294|Cluster-1445.27646|Cluster-1445.14963|Cluster-1445.19598|Cluster-1445.14142
KEGG	ko04270	Vascular smooth muscle contraction	23|1559	121|5842	0.931732	0.999923	23	Cluster-1445.12278|Cluster-1445.12320|Cluster-1445.18824|Cluster-1445.6195|Cluster-1445.12257|Cluster-1445.29891|Cluster-1445.13464|Cluster-1445.28256|Cluster-1445.23811|Cluster-1445.4040|Cluster-1445.26438|Cluster-8410.0|Cluster-1445.21392|Cluster-11139.0|Cluster-1445.23220|Cluster-1445.10646|Cluster-1445.30723|Cluster-1445.18461|Cluster-1445.17754|Cluster-1445.24636|Cluster-1445.6605|Cluster-14…
KEGG	ko01522	Endocrine resistance	17|1559	94|5842	0.934999	0.999923	17	Cluster-1445.3834|Cluster-1445.14815|Cluster-1445.26468|Cluster-1445.3951|Cluster-1445.24966|Cluster-11139.0|Cluster-1445.24457|Cluster-1445.20976|Cluster-1445.14266|Cluster-1445.5502|Cluster-1445.3396|Cluster-1445.18659|Cluster-1445.26438|Cluster-1445.7769|Cluster-1445.16287|Cluster-1445.8897|Cluster-1445.15378
KEGG	ko00630	Glyoxylate and dicarboxylate metabolism	3|1559	24|5842	0.936588	0.999923	3	Cluster-1445.25071|Cluster-1445.16867|Cluster-1445.19357
KEGG	ko05231	Choline metabolism in cancer	15|1559	85|5842	0.937286	0.999923	15	Cluster-1445.6380|Cluster-1445.14360|Cluster-1445.3951|Cluster-1445.18153|Cluster-1445.24406|Cluster-1445.19994|Cluster-1445.14266|Cluster-1445.5502|Cluster-1445.12257|Cluster-1445.10223|Cluster-1445.18659|Cluster-1445.18619|Cluster-1445.20583|Cluster-1445.9167|Cluster-1445.17214
KEGG	ko04912	GnRH signaling pathway	15|1559	85|5842	0.937286	0.999923	15	Cluster-1445.12278|Cluster-1445.6605|Cluster-1445.24966|Cluster-11139.0|Cluster-1445.28256|Cluster-1445.5502|Cluster-1445.12257|Cluster-1445.24394|Cluster-1445.18659|Cluster-1445.4040|Cluster-1445.26438|Cluster-1445.3396|Cluster-1445.22987|Cluster-1445.15378|Cluster-1445.17890
KEGG	ko05214	Glioma	9|1559	56|5842	0.937757	0.999923	9	Cluster-1445.3951|Cluster-1445.13190|Cluster-1445.14266|Cluster-1445.5502|Cluster-1445.24457|Cluster-1445.12257|Cluster-1445.9451|Cluster-1445.7769|Cluster-1445.18659
KEGG	ko03420	Nucleotide excision repair	8|1559	51|5842	0.937969	0.999923	8	Cluster-1445.11807|Cluster-1445.5992|Cluster-1445.22271|Cluster-1445.16865|Cluster-1445.9935|Cluster-1445.19237|Cluster-1445.15748|Cluster-1445.25452
KEGG	ko04114	Oocyte meiosis	19|1559	105|5842	0.943801	0.999923	19	Cluster-1445.5148|Cluster-1445.19677|Cluster-11139.0|Cluster-1445.16154|Cluster-1445.1010|Cluster-1445.19967|Cluster-1445.7896|Cluster-1445.6524|Cluster-1445.6961|Cluster-5261.0|Cluster-1445.18021|Cluster-1445.4040|Cluster-1445.14481|Cluster-1445.22274|Cluster-1445.5853|Cluster-1445.26438|Cluster-1445.22372|Cluster-1445.10560|Cluster-1445.3773
KEGG	ko04664	Fc epsilon RI signaling pathway	12|1559	72|5842	0.945327	0.999923	12	Cluster-1445.24435|Cluster-1445.29033|Cluster-1445.24578|Cluster-1445.4509|Cluster-1445.14266|Cluster-1445.5502|Cluster-1445.22435|Cluster-1445.10223|Cluster-1445.12257|Cluster-1445.3396|Cluster-1445.22987|Cluster-1445.17890
KEGG	ko00521	Streptomycin biosynthesis	1|1559	12|5842	0.94957	0.999923	1	Cluster-1445.3134
KEGG	ko04213	Longevity regulating pathway - multiple species	9|1559	58|5842	0.950514	0.999923	9	Cluster-1445.16168|Cluster-1445.21676|Cluster-1445.3951|Cluster-11139.0|Cluster-1445.14411|Cluster-1445.14266|Cluster-1445.10305|Cluster-1445.23052|Cluster-1445.26438
KEGG	ko05161	Hepatitis B	24|1559	130|5842	0.951814	0.999923	24	Cluster-1445.18194|Cluster-1445.4537|Cluster-1445.8255|Cluster-1445.17259|Cluster-1445.13630|Cluster-1445.14101|Cluster-1445.12365|Cluster-1445.10450|Cluster-1445.12257|Cluster-1445.16831|Cluster-1445.13684|Cluster-1445.14266|Cluster-1445.11114|Cluster-1445.14815|Cluster-1445.9451|Cluster-1445.2351|Cluster-1445.25637|Cluster-1445.8382|Cluster-1445.8040|Cluster-1445.18021|Cluster-1445.1067|Cluster…
KEGG	ko04391	Hippo signaling pathway - fly	14|1559	83|5842	0.951981	0.999923	14	Cluster-1445.10241|Cluster-1445.23436|Cluster-1445.26876|Cluster-1445.9545|Cluster-1445.7772|Cluster-1445.18749|Cluster-1445.18021|Cluster-1445.19629|Cluster-1445.16987|Cluster-1445.19626|Cluster-1445.15812|Cluster-1445.20141|Cluster-1445.16450|Cluster-1445.28100
KEGG	ko04011	MAPK signaling pathway - yeast	3|1559	26|5842	0.954632	0.999923	3	Cluster-1445.24685|Cluster-1445.3396|Cluster-1445.12257
KEGG	ko04113	Meiosis - yeast	9|1559	59|5842	0.955979	0.999923	9	Cluster-1445.6819|Cluster-1445.24963|Cluster-1445.19967|Cluster-1445.16154|Cluster-9059.0|Cluster-1445.6961|Cluster-5261.0|Cluster-1445.11255|Cluster-1445.11282
KEGG	ko04662	B cell receptor signaling pathway	13|1559	79|5842	0.95601	0.999923	13	Cluster-1445.8040|Cluster-1919.0|Cluster-1445.1752|Cluster-1445.29033|Cluster-1445.24578|Cluster-1445.4509|Cluster-1445.14266|Cluster-1445.5502|Cluster-1445.22435|Cluster-1445.10223|Cluster-1445.8243|Cluster-1445.24558|Cluster-1445.24435
KEGG	ko00514	Other types of O-glycan biosynthesis	3|1559	27|5842	0.961733	0.999923	3	Cluster-1445.14852|Cluster-1445.7684|Cluster-1445.17606
KEGG	ko04310	Wnt signaling pathway	24|1559	133|5842	0.962259	0.999923	24	Cluster-1445.13499|Cluster-1445.14902|Cluster-1445.13630|Cluster-1445.8040|Cluster-1445.10223|Cluster-1445.12257|Cluster-1445.5222|Cluster-1445.2478|Cluster-1445.4537|Cluster-1445.8402|Cluster-1445.4354|Cluster-1445.3330|Cluster-1445.7985|Cluster-1445.4455|Cluster-1445.17880|Cluster-1445.22907|Cluster-1445.1067|Cluster-1445.13697|Cluster-1445.8433|Cluster-1445.22728|Cluster-1445.5015|Cluster-1445…
KEGG	ko03030	DNA replication	6|1559	45|5842	0.965347	0.999923	6	Cluster-1445.6819|Cluster-1445.11282|Cluster-1445.22271|Cluster-1445.5992|Cluster-1445.11255|Cluster-1445.25452
KEGG	ko04340	Hedgehog signaling pathway	7|1559	51|5842	0.967811	0.999923	7	Cluster-1445.13890|Cluster-1445.3938|Cluster-1445.21537|Cluster-1445.14902|Cluster-1445.22350|Cluster-1445.19830|Cluster-1445.10033
KEGG	ko04720	Long-term potentiation	8|1559	58|5842	0.973919	0.999923	8	Cluster-8977.0|Cluster-1445.4537|Cluster-1445.7896|Cluster-1445.1067|Cluster-1445.12257|Cluster-1445.4040|Cluster-1445.2519|Cluster-8475.0
KEGG	ko05142	Chagas disease (American trypanosomiasis)	14|1559	89|5842	0.974053	0.999923	14	Cluster-1445.16476|Cluster-1445.3520|Cluster-1445.21602|Cluster-1445.15596|Cluster-1445.18194|Cluster-1445.14266|Cluster-1445.12365|Cluster-1445.3396|Cluster-1445.17160|Cluster-1445.14898|Cluster-1445.22614|Cluster-1445.25637|Cluster-1445.8382|Cluster-1445.18128
KEGG	ko03010	Ribosome	20|1559	119|5842	0.975543	0.999923	20	Cluster-1445.13453|Cluster-1445.7946|Cluster-1445.16603|Cluster-1445.17793|Cluster-1445.27970|Cluster-1445.21195|Cluster-1445.2464|Cluster-1445.17930|Cluster-1445.18585|Cluster-1445.15245|Cluster-1445.2890|Cluster-1445.18057|Cluster-1445.2290|Cluster-1445.3180|Cluster-1445.9688|Cluster-2465.0|Cluster-1445.12096|Cluster-1445.16924|Cluster-1445.9232|Cluster-1445.15411
KEGG	ko00513	Various types of N-glycan biosynthesis	5|1559	42|5842	0.976442	0.999923	5	Cluster-1445.14852|Cluster-1445.12245|Cluster-1445.7684|Cluster-1445.8396|Cluster-1445.14951
KEGG	ko00970	Aminoacyl-tRNA biosynthesis	5|1559	42|5842	0.976442	0.999923	5	Cluster-1445.23521|Cluster-1445.3402|Cluster-1445.8658|Cluster-1445.23145|Cluster-1445.10713
KEGG	ko04013	MAPK signaling pathway - fly	13|1559	85|5842	0.976796	0.999923	13	Cluster-1445.18021|Cluster-1445.18182|Cluster-1445.7774|Cluster-1445.13986|Cluster-1445.5502|Cluster-1445.3396|Cluster-1445.18659|Cluster-1445.23874|Cluster-1445.18819|Cluster-1445.8402|Cluster-1445.19493|Cluster-1445.15378|Cluster-1445.17890
KEGG	ko00510	N-Glycan biosynthesis	6|1559	48|5842	0.9773	0.999923	6	Cluster-1445.8396|Cluster-1445.12245|Cluster-1445.13776|Cluster-1445.7684|Cluster-1445.14951|Cluster-1445.18482
KEGG	ko04141	Protein processing in endoplasmic reticulum	26|1559	149|5842	0.978412	0.999923	26	Cluster-1445.17107|Cluster-1445.23273|Cluster-1445.4163|Cluster-1445.29738|Cluster-1445.19493|Cluster-1445.18172|Cluster-1445.3148|Cluster-1445.12845|Cluster-1445.18506|Cluster-1445.9257|Cluster-1445.4762|Cluster-1445.18182|Cluster-1445.14935|Cluster-1445.21164|Cluster-1445.13175|Cluster-1445.25451|Cluster-1445.2351|Cluster-1445.13110|Cluster-1445.8396|Cluster-1445.26111|Cluster-1445.7774|Cluster…
KEGG	ko00562	Inositol phosphate metabolism	12|1559	81|5842	0.979518	0.999923	12	Cluster-1445.3134|Cluster-1445.18176|Cluster-1445.14038|Cluster-1445.1730|Cluster-1445.19832|Cluster-1445.21963|Cluster-1445.17216|Cluster-1445.24434|Cluster-1445.19743|Cluster-1445.15437|Cluster-1445.25851|Cluster-1445.18058
KEGG	ko04745	Phototransduction - fly	4|1559	37|5842	0.979813	0.999923	4	Cluster-1445.16987|Cluster-1445.4040|Cluster-1445.12257|Cluster-1445.16450
KEGG	ko04390	Hippo signaling pathway	23|1559	136|5842	0.98071	0.999923	23	Cluster-1445.9545|Cluster-1445.14902|Cluster-1445.15812|Cluster-1445.5222|Cluster-1445.7420|Cluster-1445.13499|Cluster-1445.22614|Cluster-1445.20141|Cluster-1445.16476|Cluster-1445.4354|Cluster-1445.21439|Cluster-1445.2478|Cluster-1445.17426|Cluster-1445.19629|Cluster-1445.18021|Cluster-1445.1634|Cluster-1445.22728|Cluster-1445.5015|Cluster-1445.22274|Cluster-1445.16987|Cluster-1445.19421|Cluster…
KEGG	ko05202	Transcriptional misregulation in cancer	28|1559	160|5842	0.981109	0.999923	28	Cluster-1445.27846|Cluster-1445.16075|Cluster-1445.25974|Cluster-1445.14902|Cluster-1445.16060|Cluster-1445.20543|Cluster-1445.5332|Cluster-1445.18664|Cluster-1445.29033|Cluster-1445.25513|Cluster-4627.0|Cluster-1445.6094|Cluster-1445.16663|Cluster-1445.23874|Cluster-1445.242|Cluster-1445.17765|Cluster-1445.10333|Cluster-1445.25473|Cluster-1445.15900|Cluster-1445.30255|Cluster-1445.2986|Cluster-1…
KEGG	ko04211	Longevity regulating pathway	14|1559	92|5842	0.981222	0.999923	14	Cluster-1445.16168|Cluster-1445.21676|Cluster-1445.3951|Cluster-11139.0|Cluster-1445.11691|Cluster-1445.23543|Cluster-1445.14411|Cluster-1445.14266|Cluster-1445.18825|Cluster-1445.10305|Cluster-1445.23052|Cluster-1445.26438|Cluster-1445.7938|Cluster-1445.10450
KEGG	ko04925	Aldosterone synthesis and secretion	10|1559	72|5842	0.982812	0.999923	10	Cluster-1445.6605|Cluster-1445.20970|Cluster-11139.0|Cluster-1445.12320|Cluster-1445.28256|Cluster-1445.6468|Cluster-1445.10450|Cluster-1445.12257|Cluster-1445.26438|Cluster-1445.4040
KEGG	ko04621	NOD-like receptor signaling pathway	6|1559	50|5842	0.983005	0.999923	6	Cluster-1445.18172|Cluster-1445.15701|Cluster-1445.24986|Cluster-1445.13986|Cluster-1445.3396|Cluster-1445.24450
KEGG	ko04932	Non-alcoholic fatty liver disease (NAFLD)	21|1559	129|5842	0.984999	0.999923	21	Cluster-1445.16168|Cluster-1445.16291|Cluster-1445.19493|Cluster-1445.21676|Cluster-1445.5063|Cluster-1445.18182|Cluster-1445.20868|Cluster-1445.12845|Cluster-1445.4060|Cluster-1445.16517|Cluster-950.0|Cluster-1445.17156|Cluster-1445.10305|Cluster-1445.23052|Cluster-1445.14266|Cluster-1445.18617|Cluster-1445.26736|Cluster-1445.15093|Cluster-1445.8382|Cluster-1445.17952|Cluster-1445.13110
KEGG	ko03060	Protein export	1|1559	19|5842	0.989917	0.999923	1	Cluster-1445.11167
KEGG	ko05220	Chronic myeloid leukemia	8|1559	66|5842	0.991097	0.999923	8	Cluster-1445.14815|Cluster-1445.14266|Cluster-1445.5502|Cluster-1445.24457|Cluster-1445.9451|Cluster-1445.14950|Cluster-1445.7769|Cluster-1445.11923
KEGG	ko00190	Oxidative phosphorylation	16|1559	110|5842	0.992042	0.999923	16	Cluster-1445.16291|Cluster-1445.19337|Cluster-1445.12670|Cluster-1445.19176|Cluster-1445.18617|Cluster-1445.12275|Cluster-1445.17088|Cluster-1445.4060|Cluster-1445.5063|Cluster-8679.0|Cluster-1445.16251|Cluster-1445.26736|Cluster-1445.5196|Cluster-1445.18303|Cluster-1445.20355|Cluster-1445.28631
KEGG	ko03015	mRNA surveillance pathway	12|1559	89|5842	0.992104	0.999923	12	Cluster-1445.15868|Cluster-1445.5141|Cluster-1445.4608|Cluster-1445.27676|Cluster-1445.5828|Cluster-1445.10887|Cluster-1445.21785|Cluster-1445.13397|Cluster-1445.22157|Cluster-1445.15525|Cluster-1445.14323|Cluster-1445.12058
KEGG	ko04150	mTOR signaling pathway	22|1559	141|5842	0.992521	0.999923	22	Cluster-1445.19327|Cluster-1445.16168|Cluster-1445.7896|Cluster-1445.13039|Cluster-1445.3572|Cluster-1445.12257|Cluster-1445.19908|Cluster-1445.29046|Cluster-1445.5222|Cluster-1445.20549|Cluster-1445.14266|Cluster-1445.14411|Cluster-1445.23052|Cluster-1445.19176|Cluster-1445.5502|Cluster-1445.25459|Cluster-1445.3951|Cluster-1445.17088|Cluster-1445.22728|Cluster-1445.11148|Cluster-1445.9686|Cluste…
KEGG	ko00020	Citrate cycle (TCA cycle)	2|1559	29|5842	0.992761	0.999923	2	Cluster-1445.15464|Cluster-1445.19002
KEGG	ko04916	Melanogenesis	12|1559	90|5842	0.993024	0.999923	12	Cluster-1445.5222|Cluster-1445.8068|Cluster-11139.0|Cluster-1445.4537|Cluster-1445.17160|Cluster-1445.20397|Cluster-1445.10450|Cluster-1445.22728|Cluster-1445.1067|Cluster-1445.26438|Cluster-1445.12257|Cluster-1445.19421
KEGG	ko05221	Acute myeloid leukemia	5|1559	50|5842	0.993282	0.999923	5	Cluster-1445.5502|Cluster-1445.14815|Cluster-1445.22907|Cluster-1445.3951|Cluster-1445.14266
KEGG	ko03013	RNA transport	25|1559	159|5842	0.994499	0.999923	25	Cluster-1445.4126|Cluster-1445.21869|Cluster-1445.14158|Cluster-1445.20785|Cluster-1445.10477|Cluster-1445.28165|Cluster-1445.16858|Cluster-1445.17597|Cluster-1445.15525|Cluster-1445.12845|Cluster-1445.19082|Cluster-1445.5141|Cluster-1445.11131|Cluster-1445.10870|Cluster-1445.15868|Cluster-1445.11739|Cluster-1445.14915|Cluster-1445.4608|Cluster-1445.17206|Cluster-1445.6631|Cluster-1445.27676|Clus…
KEGG	ko04392	Hippo signaling pathway -multiple species	3|1559	38|5842	0.994658	0.999923	3	Cluster-1445.15812|Cluster-1445.20141|Cluster-1445.26876
KEGG	ko04120	Ubiquitin mediated proteolysis	18|1559	125|5842	0.995264	0.999923	18	Cluster-1445.19289|Cluster-1445.17107|Cluster-1445.2958|Cluster-1445.1657|Cluster-1445.19967|Cluster-1445.16154|Cluster-1445.7774|Cluster-1445.24986|Cluster-1445.15334|Cluster-1445.9312|Cluster-1445.25624|Cluster-1445.2091|Cluster-1445.15617|Cluster-1445.14158|Cluster-1445.8402|Cluster-1445.25609|Cluster-1445.26790|Cluster-1445.25180
KEGG	ko04070	Phosphatidylinositol signaling system	14|1559	104|5842	0.995308	0.999923	14	Cluster-1445.18176|Cluster-1445.14360|Cluster-1445.14038|Cluster-1445.14266|Cluster-1445.19832|Cluster-1445.12257|Cluster-1445.17216|Cluster-1445.4040|Cluster-1445.2110|Cluster-1445.21963|Cluster-1445.24434|Cluster-1445.19743|Cluster-1445.15437|Cluster-1445.25851
KEGG	ko05010	Alzheimer's disease	25|1559	163|5842	0.996309	0.999923	25	Cluster-1445.18194|Cluster-1445.4060|Cluster-1445.14101|Cluster-1445.4040|Cluster-1445.18617|Cluster-1445.9715|Cluster-1445.28256|Cluster-1445.2519|Cluster-1445.5063|Cluster-1445.9196|Cluster-1445.14815|Cluster-8977.0|Cluster-1445.17156|Cluster-1445.2351|Cluster-1445.24753|Cluster-1445.8382|Cluster-8475.0|Cluster-1445.6605|Cluster-1445.16291|Cluster-1445.7773|Cluster-1445.13697|Cluster-1445.10821…
KEGG	ko03050	Proteasome	2|1559	33|5842	0.996787	0.999923	2	Cluster-1445.20313|Cluster-1445.9253
KEGG	ko03040	Spliceosome	16|1559	121|5842	0.997797	0.999923	16	Cluster-1445.27646|Cluster-1445.26457|Cluster-1445.28584|Cluster-1445.27676|Cluster-1445.20587|Cluster-5277.0|Cluster-1445.23814|Cluster-1445.14859|Cluster-1445.4608|Cluster-1445.8948|Cluster-1445.22287|Cluster-1445.15525|Cluster-1445.18483|Cluster-1445.19598|Cluster-1445.15096|Cluster-1445.9875
KEGG	ko04660	T cell receptor signaling pathway	9|1559	88|5842	0.999136	0.999923	9	Cluster-1445.6297|Cluster-1445.8040|Cluster-1919.0|Cluster-1445.15596|Cluster-1445.14266|Cluster-1445.5502|Cluster-1445.22435|Cluster-1445.3396|Cluster-1445.5059
KEGG	ko05012	Parkinson's disease	14|1559	118|5842	0.99921	0.999923	14	Cluster-1445.14101|Cluster-1445.16291|Cluster-1445.17107|Cluster-1445.5063|Cluster-1445.7773|Cluster-1445.9460|Cluster-1445.17160|Cluster-1445.15334|Cluster-1445.22601|Cluster-1445.4060|Cluster-1445.18617|Cluster-1445.14898|Cluster-1445.26736|Cluster-1445.20355
KEGG	ko05016	Huntington's disease	22|1559	181|5842	0.999923	0.999923	22	Cluster-1445.4060|Cluster-1445.14101|Cluster-1445.10450|Cluster-1445.4040|Cluster-1445.18617|Cluster-1445.11259|Cluster-1445.15003|Cluster-1445.4537|Cluster-8999.0|Cluster-1445.19892|Cluster-1445.5063|Cluster-1445.24225|Cluster-1445.13766|Cluster-8977.0|Cluster-1445.11425|Cluster-1445.7377|Cluster-8475.0|Cluster-1445.16291|Cluster-1445.16824|Cluster-1445.1067|Cluster-1445.19884|Cluster-1445.26736
